# Supplementary material for: Change in grounding line location on the Antarctic Peninsula measured using a tidal motion offset correlation method
Source: Copernicus journal article supplement (doi:10.5194/egusphere-2023-2874), 2024-01-11
Supplement: Supplementary file [file egusphere-2023-2874-AC1-supplement.pdf]

# Response to reviewer comments for ‘Change in grounding line location on the Antarctic Peninsula measured using a tidal motion offset correlation method’ – EGUSPHERE-2023-2874

Benjamin J. Wallis, on behalf of the authors.

We thank the editor and three reviewers for their time and effort in reading this manuscript and providing useful and insightful comments. We are grateful for the thoughtful and collegial nature of the discussion and feel that responding to the reviewers’ comments has improved this manuscript in terms of scientific content and clarity.

The reviewers’ comments and our responses have been combined in this single document. There are some cases where comments from reviewers and our responses overlap, so placing all the comments together improves clarity. The comments and responses are given in table format below. The line field refers to the comment’s line in the original manuscript, while ‘new line’ indicates the position of the relevant changes in the updated manuscript. The proposed changes to the manuscript, figures, and supplementary material follow these tabulated comments. We have only included figures and figure captions which are subject to change in this document. Figures 2, 3, 4 and supplementary figure 2 remain unchanged.

Reviewer 1:

| ID  | Comment                                                                                                                                                                                                                                                                                                                                                                                                                                                                                                                                                                                                                              | Line | Response                                                                                                                                                                                                                                                                                                                                                                                                      | New line |
|-----|--------------------------------------------------------------------------------------------------------------------------------------------------------------------------------------------------------------------------------------------------------------------------------------------------------------------------------------------------------------------------------------------------------------------------------------------------------------------------------------------------------------------------------------------------------------------------------------------------------------------------------------|------|---------------------------------------------------------------------------------------------------------------------------------------------------------------------------------------------------------------------------------------------------------------------------------------------------------------------------------------------------------------------------------------------------------------|----------|
| 1.1 | The authors propose a new method for mapping grounding line, evaluate its precision, and apply to the Antarctic Peninsula to detect changes since the 1990s. They report O(10km) retreat in the Peninsula since 1996. The paper is well written, the results are significant, the analysis of error is good, I would however recommend reducing the discussion section a bit to remove many paragraphs of literature review, perhaps trim by 30%. Overall, I would recommend publication after minor revision. I am only curious why the Mohajerani et al. 2021 dataset from year 2018, Antarctic wide, was not used for comparison. |      | We thank the reviewer for their time, comments, and constructive feedback. We have implemented the vast majority of their suggestions, as indicated below.                                                                                                                                                                                                                                                    |          |
| 1.2 | Line 36: Not sure I agree with this definition of the grounding zone. The grounding zone defines the range of migration of the grounding line, whereas what is described here is the flexure zone, which is the zone over which ice adjusts to flotation. It would be good to agree on that nomenclature, and I would recommend that the authors adopts this one.                                                                                                                                                                                                                                                                    | 36   | We have used the definition of the grounding zone defined by Fricker et al. 2009: <i>'The GZ is the region of the ice sheet straddling the GL, encompassing the transition from fully grounded ice to ice in hydrostatic equilibrium with the underlying ocean.'</i><br><br>We choose this definition because it encompasses all features associated with the transition from fully grounded to floating ice. | 37       |
| 1.3 | Line 52. One of the earlier demonstration of GL mapping with DInSAR was Rignot, J. Glaciol., 1996 and Rignot et al. Science, 1997; Rignot, Science, 1998. The earliest I know of that used differential interferometry (which Goldstein et al., 1993 did not) was: Hartl, P., K.-H. Thiel, X. Wu, C. Doake & J. Sievers 1994 Application of SAR interferometry with ERS-1 in the Antarctic — Earth Observ. Quarterly 43: 1-4, but this is not a peer review article .. Just FYI.                                                                                                                                                     | 52   | Thank you for these helpful clarifications.<br><br><b>Done.</b> We have updated the reference with Rignot et al. 1996 and Rignot 1998.                                                                                                                                                                                                                                                                        | 57       |
| 1.4 | Line 60. I actually do not agree with this. See Rignot et al. GRL 2011. The inland limit of fringes, the limits where you see ice lift up from the bed is the grounding line. What you mention here at the hinge limit is a mathematical model fitting to the elastic deformation which relates to the point of hinging and is typically displaced 1 km upstream of the GL. I sort of abandoned this point F over time, because the only point that matters is G, and Rignot et al. GRL 2011 describes how it is deduced from Differential interferometry.                                                                           | 60   | <b>Done.</b> We have changed this line to:<br><br><i>'The inland limit of these fringes denotes the grounding line (Rignot et al., 2011)'</i>                                                                                                                                                                                                                                                                 | 64       |
| 1.5 | Line 61. SAR coherence can ALWAYS be maintained. The true limitation of the repeat pass of the satellite.                                                                                                                                                                                                                                                                                                                                                                                                                                                                                                                            | 61   | <b>Done.</b> We have amended the text to reflect that the requirement for coherence is within the constraint of missions' acquisition plans. Changed to:                                                                                                                                                                                                                                                      | 65       |

|      |                                                                                                                                                                                                                                                                                                                                                      |     |                                                                                                                                                                                                                                                                                                                                                                                                                                                                               |     |
|------|------------------------------------------------------------------------------------------------------------------------------------------------------------------------------------------------------------------------------------------------------------------------------------------------------------------------------------------------------|-----|-------------------------------------------------------------------------------------------------------------------------------------------------------------------------------------------------------------------------------------------------------------------------------------------------------------------------------------------------------------------------------------------------------------------------------------------------------------------------------|-----|
|      |                                                                                                                                                                                                                                                                                                                                                      |     | <i>'While highly accurate, the major limitations of the differential SAR interferometry (DInSAR) technique for grounding line measurements are the requirements for coherence between SAR acquisitions and well resolved interferometric fringes. This must be achieved while operating within the constraints of current missions' acquisition plans.'</i>                                                                                                                   |     |
| 1.6  | Line 68. DInSAR is not used to delineate F, but G. See Rignot et al. GRL 2011. Also see above comments.                                                                                                                                                                                                                                              | 68  | <b>Done.</b> Changed to:<br><br>'...which along with DInSAR GL fringe delineation are dynamic methods that locate grounding zone features by measuring vertical ice motion in response to short-term local sea-level variation.'                                                                                                                                                                                                                                              | 73  |
| 1.7  | Line 71. Did Joughin really map "F"?                                                                                                                                                                                                                                                                                                                 | 71  | <b>Done.</b> We have changed the phrasing of this sentence to:<br><br><i>'A small number of studies have used a technique called differential range offset tracking (DROT), a dynamic technique which measures vertical tidal motion in SAR imagery through intensity feature tracking rather than interferometry, to map the GL on individual glaciers of interest in regions without interferometric coherence (Marsh et al., 2013; Hogg, 2015; Joughin et al., 2016).'</i> | 76  |
| 1.8  | Line 95. If you call it "new" method. I need to be sure. Unfortunately, Joughin et al. Geophys. Res. Lett. (2016) used feature tracking on Pine Island Glacier to delineate the grounding line. Please refer to that earlier article by Ian J. and explain what is truly new in your TMOC method, which I think is the time series concept. Correct? | 95  | The reviewer is correct; the time series component, the idea of measuring correlation with modelled tide are the new parts of this technique.<br><br>We believe that the method is explained in sufficient detail. We have given clear explanations of how it has been developed based on earlier differential range offset tracking studies, such as the one by Joughin that the reviewer references. See sections 2.1, 2.2 and Figure 1.                                    | 101 |
| 1.9  | Line 116. Yes.                                                                                                                                                                                                                                                                                                                                       | 116 | No response required.                                                                                                                                                                                                                                                                                                                                                                                                                                                         |     |
| 1.10 | Speckle tracking is 10 times less sensitive to vertical than phase. See documentation of that in Mouginot et al. Geophys. Res. Lett. 2019 (phase map of Antarctica). A factor 10 would speak more than "significantly less".                                                                                                                         | 125 | <b>Done.</b> Changed to: 'around an order of magnitude less sensitive'                                                                                                                                                                                                                                                                                                                                                                                                        | 131 |
| 1.11 | Line 134. This applies only if Delta S is in ground range. In slant range, this formula is wrong. Please correct text accordingly to say "ground range".                                                                                                                                                                                             | 134 | <b>Done.</b> Thank you for pointing out this ambiguity in our phrasing.                                                                                                                                                                                                                                                                                                                                                                                                       | 140 |
| 1.12 | Line 159. What reference pressure do you use?                                                                                                                                                                                                                                                                                                        | 159 | We calculate the difference in ERA5 sea-level pressure between the Sentinel-1 acquisitions which make up the feature tracking pair. Therefore, we do not use a reference pressure.                                                                                                                                                                                                                                                                                            | 162 |
| 1.13 | Line 182. You expect .. is this evaluated later on?                                                                                                                                                                                                                                                                                                  | 182 | This is evaluated in section 3.2.                                                                                                                                                                                                                                                                                                                                                                                                                                             | 193 |

|      |                                                                                                                                                                                                                                                                                  |     |                                                                                                                                                                                                                                                                                                                                                                                                                                                                                                                                                                                                                                                                                                                                                                                                                                                                                                                                                                                                                                                                                                                                                                                                                                                                                                                                                                                                                                                                                                                                                                                                                                                                                                                                                                                                                                                                                                                                                             |     |
|------|----------------------------------------------------------------------------------------------------------------------------------------------------------------------------------------------------------------------------------------------------------------------------------|-----|-------------------------------------------------------------------------------------------------------------------------------------------------------------------------------------------------------------------------------------------------------------------------------------------------------------------------------------------------------------------------------------------------------------------------------------------------------------------------------------------------------------------------------------------------------------------------------------------------------------------------------------------------------------------------------------------------------------------------------------------------------------------------------------------------------------------------------------------------------------------------------------------------------------------------------------------------------------------------------------------------------------------------------------------------------------------------------------------------------------------------------------------------------------------------------------------------------------------------------------------------------------------------------------------------------------------------------------------------------------------------------------------------------------------------------------------------------------------------------------------------------------------------------------------------------------------------------------------------------------------------------------------------------------------------------------------------------------------------------------------------------------------------------------------------------------------------------------------------------------------------------------------------------------------------------------------------------------|-----|
| 1.14 | Line 208. Who says they are only tidewater?                                                                                                                                                                                                                                      | 208 | <p><b>Done.</b> This statement is based on existing grounding line datasets. We have added a reference to these:</p> <p><i>‘Although, according to existing grounding line datasets (Bindshadler et al., 2011; Rignot et al., 2016; Mouginot et al., 2017), most glaciers on the peninsula outside the ice shelves are thought to be tidewater glaciers’</i></p>                                                                                                                                                                                                                                                                                                                                                                                                                                                                                                                                                                                                                                                                                                                                                                                                                                                                                                                                                                                                                                                                                                                                                                                                                                                                                                                                                                                                                                                                                                                                                                                            | 218 |
| 1.15 | Line 219. Ref. needed.                                                                                                                                                                                                                                                           | 219 | <p><b>Done.</b> We have added a reference to Zhong et al. 2023, which describes remote sensing of ephemeral grounding points in detail.</p>                                                                                                                                                                                                                                                                                                                                                                                                                                                                                                                                                                                                                                                                                                                                                                                                                                                                                                                                                                                                                                                                                                                                                                                                                                                                                                                                                                                                                                                                                                                                                                                                                                                                                                                                                                                                                 | 222 |
| 1.16 | Line 225. Please note that Mohajerani et al. Nature Sci. Rep. 2021 produced an Antarctic wide data set for year 2018 that includes the East coast of the Antarctica Peninsula. Why did not you use that dataset, also distributed at NSIDC, for comparison? Or could you add it? | 225 | <p>The Mohajerani et al. 2021 dataset is an excellent and innovative product for grounding line delineations. We agree with the reviewer’s suggestion that a comparison to this dataset would be a useful addition to this study.</p> <p>We did not include this dataset in the original manuscript, due to the format that the data are provided from Mohajerani et al. 2021. For the quantitative performance evaluation of our TMOC method (Figure 4) we require a single grounding line position for comparison. However, the grounding line delineations from Mohajerani et al. 2021 are given as vectors of every GL delineated from individual 6 or 12 day Sentinel-1 pairs, so there are dozens of GL measurements and no definitive single grounding line for the period. To use this data in a fair comparison, as we have done with the other reference GL datasets, would require us to develop a method to evaluate the best GL from the Mohajerani set. Producing such a secondary product is out of scope for this study.</p> <p>The Mohajerani et al. 2021 dataset was also not included in the qualitative comparisons between datasets (Supplementary Figure 2) because these comparisons focused on areas where the Mohajerani data does not have coverage. The northward limit of GLs in the Mohajerani dataset in the AP is the Larsen B ice shelf remnant in the SCAR Inlet. The lack of coverage north of this position is most likely due to the incoherence of Sentinel-1 6 day pairs in locations north of the SCAR Inlet.</p> <p>However, as stated above, we do agree with the reviewer’s suggestion that a comparison to this dataset would be beneficial. Therefore, we have added a new supplementary figure (Supplementary Figure 1) to the manuscript which makes a qualitative comparison between our data and the Mohajerani et al. 2021 data around the Jason Peninsula, George VI Ice Shelf and Larsen D Ice Shelf</p> | 299 |

|      |                                                                                                                                                                                                                                                       |     |                                                                                                                                                                                                                                                                                                                                                                                                                                                                                                                                                                                                                                                                                                                                                                                                                                                                                                                                                                                                                                                                                                                                                                                                                                                                                                                                                                                                                                                                                                 |     |
|------|-------------------------------------------------------------------------------------------------------------------------------------------------------------------------------------------------------------------------------------------------------|-----|-------------------------------------------------------------------------------------------------------------------------------------------------------------------------------------------------------------------------------------------------------------------------------------------------------------------------------------------------------------------------------------------------------------------------------------------------------------------------------------------------------------------------------------------------------------------------------------------------------------------------------------------------------------------------------------------------------------------------------------------------------------------------------------------------------------------------------------------------------------------------------------------------------------------------------------------------------------------------------------------------------------------------------------------------------------------------------------------------------------------------------------------------------------------------------------------------------------------------------------------------------------------------------------------------------------------------------------------------------------------------------------------------------------------------------------------------------------------------------------------------|-----|
|      |                                                                                                                                                                                                                                                       |     | <p>where both have good coverage. This comparison shows that our TMOC grounding line falls within the distribution of GLs for the year 2018 delineated by Mohajerani's method.</p> <p>We have added the following text to section 3.2:</p> <p><i>'We make a further comparison between our 2019-20 TMOC GL and DInSAR using GL automatically delineated with deep learning from all available Sentinel-1 DInSAR from the year 2018 (Mohajerani et al., 2021). This analysis is limited to a qualitative basis, because the available data are the set of GL delineations from all available interferograms, so there is not a definitive GL for a quantitative comparison without a further manual interpretation. We find that our TMOC GL is almost always within the distribution of GLs from Mohajerani et al.'s data, between the most inland and most seaward measured locations (Supplementary Figure 1). This comparison also highlights where the TMOC method can produce a grounding line measurement where 6-day repeat Sentinel-1 DInSAR cannot, for example in on Flask and Leppard Glaciers in the SCAR inlet (Supplementary Figure 1b), and Western Palmer Land (Supplementary Figure 1d). These results further support our conclusion that the TMOC GL position is located slightly seaward of the DInSAR GL position, if the most inland limit of DInSAR fringes observed in a given period is considered to be the best measurement of the grounding line position.'</i></p> |     |
| 1.17 | Line 256. I am not sure this is true for the Mohajerani et al 2021 dataset. They include ALL of these areas. Can you please include?                                                                                                                  | 256 | There are substantial gaps in the Mohajerani et al. 2021 dataset in the eastern margin of George VI Ice Shelf, this is shown in the new supplementary figure 1 which we have included.                                                                                                                                                                                                                                                                                                                                                                                                                                                                                                                                                                                                                                                                                                                                                                                                                                                                                                                                                                                                                                                                                                                                                                                                                                                                                                          | 266 |
| 1.18 | Line 310. Please add error bars on these retreat estimates.                                                                                                                                                                                           | 310 | <b>Done</b>                                                                                                                                                                                                                                                                                                                                                                                                                                                                                                                                                                                                                                                                                                                                                                                                                                                                                                                                                                                                                                                                                                                                                                                                                                                                                                                                                                                                                                                                                     | 335 |
| 1.19 | Line 405-444. This is more of a review than a new contribution. Is this necessary? You already covered this in the intro. The same comment may apply to 5.3. I would recommend cutting a bit into this, remove lit. review and focus on new elements. | 405 | <p>This section was included to highlight how a paucity of grounding line measurements in the Antarctic Peninsula has impacted the interpretation of observations in this region. This is extremely relevant because our measurements provide updated GLs which address this issue.</p> <p>Furthermore, the continued evolution of glaciers in the Larsen A and B embayments has been the subject of several publications recently: (Ochwat et al., 2023; Sun et al., 2023; Surawy-Stepney et al., 2024) and we feel our results make a contribution to this exciting and lively debate.</p>                                                                                                                                                                                                                                                                                                                                                                                                                                                                                                                                                                                                                                                                                                                                                                                                                                                                                                    | 429 |

|      |                                                                                                                                                                                                                                                 |     |                                                                                                                                                                                                                                                                                                                                                                                                                                                                                                                                                                                                                                                                                                                                                                              |       |
|------|-------------------------------------------------------------------------------------------------------------------------------------------------------------------------------------------------------------------------------------------------|-----|------------------------------------------------------------------------------------------------------------------------------------------------------------------------------------------------------------------------------------------------------------------------------------------------------------------------------------------------------------------------------------------------------------------------------------------------------------------------------------------------------------------------------------------------------------------------------------------------------------------------------------------------------------------------------------------------------------------------------------------------------------------------------|-------|
|      |                                                                                                                                                                                                                                                 |     | For these reasons, we consider this discussion necessary and have chosen to retain this section.                                                                                                                                                                                                                                                                                                                                                                                                                                                                                                                                                                                                                                                                             |       |
| 1.20 | Line 540. This should be done PRIOR to acceptance. I am surprised that this journal does not impose this to be done while the paper is submitted. I have therefore, as a reviewer, no access at this information for evaluation. Disappointing. | 540 | <p>The tide correlation maps, grounding line data and an example of the code implementation were made available for the reviewer in the ‘reviewer assets’ section of the EGU sphere website. We apologize if the data availability statement was misleading in this regard. It was written before the upload of these reviewer assets.</p> <p><b>Done.</b> Data availability statement now reads:</p> <p><i>‘Data Availability. The Antarctic Peninsula tide correlation map and Peninsula-wide 2019-20 grounding line position data will be made available at a public repository upon acceptance of this manuscript. For the purpose of review these can be provided by the corresponding author upon request are available under the EGU sphere reviewer assets.’</i></p> | 575   |
| 1.21 | Figures are good. Figure 5 should explain what year is used for the MEaSUREs grounding lines.                                                                                                                                                   | 324 | <p>Figure 5 uses the MEaSUREs Antarctic Boundaries version 2 grounding line (Mouginot et al., 2017) (MAB v2). We have added the correct reference to the caption to make this clear.</p> <p>The MAB v2 grounding line does not have a definitive timestamp, because it is a composite of DInSAR GL measurements from 1992 to 2015 complemented by other GL measurements to provide a continuous GL around the Antarctic Ice Sheet. We discuss this distinction in detail in section 3.2, lines 250-260.</p> <p>We choose to show the MAB v2 for comparison as it is the most popular grounding line dataset within the community. Supplementary Figure 2 shows the same regions as Figure 5 with a comparison to many timestamped GL measurements.</p>                       | Fig 5 |

Reviewer 2:

| ID  | Comment                                                                                                                                                                                                                                                                                                                                                                                                                                                                                         | Line | Response                                                                                                                                                                                                                                                                                                                                                      | New line |
|-----|-------------------------------------------------------------------------------------------------------------------------------------------------------------------------------------------------------------------------------------------------------------------------------------------------------------------------------------------------------------------------------------------------------------------------------------------------------------------------------------------------|------|---------------------------------------------------------------------------------------------------------------------------------------------------------------------------------------------------------------------------------------------------------------------------------------------------------------------------------------------------------------|----------|
| 2.1 | This paper presents a nice technique for providing much-needed measurements.                                                                                                                                                                                                                                                                                                                                                                                                                    |      | We thank the reviewer for their positive comments.                                                                                                                                                                                                                                                                                                            |          |
| 2.2 | Technically this is one of the cleaner papers I have reviewed. There are a number grammar and style issues, which comprise most of my comments. While largely optional, the paper's readability would be improved by applying many of them. The authors may want to consider using something like Grammarly in the future, which would have fixed many of these minor issues.                                                                                                                   |      | We are glad to hear that the reviewer was pleased with the technical content of the manuscript. We found their suggestions for readability to be helpful and have incorporated the majority of these, as indicated below.                                                                                                                                     |          |
| 2.3 | A minor point is I would like to have seen more detail on the chip sizes used to do the speckle tracking, which may affect the biases (or differences in measurement techniques – see comment about GL location below).                                                                                                                                                                                                                                                                         |      | <b>Done.</b> We have added this detail:<br><br><i>'This tracking is performed in range-azimuth radar geometry using a cross-correlation window size of 256 x 64 pixels (range x azimuth) and a step size of a quarter window.'</i>                                                                                                                            | 158      |
| 2.4 | The NISAR launch should happen in 2024. With the longer wavelength and finer resolution, there will be more glaciers where the phase can be resolved and unwrapped. In these cases, this technique could be applied using the phase in place of the offsets. A sentence or two making this point would be useful.                                                                                                                                                                               |      | <b>Done.</b> We have added the following to the discussion:<br><br><i>'The planned launch of new L-band SAR missions, NASA and ISRO's NISAR (Rosen et al., 2017; Das et al., 2022) and ESA's ROSE-L (Davidson et al., 2021), will also provide new opportunities for grounding line monitoring using DInSAR and the TMOC method presented in this study.'</i> | 545      |
| 2.5 | As I commented below, it's worth pointing out that any of these techniques only detect a signal that is the proxy for the grounding line. I don't know of any work that has shown that the point of actual ungrounding is definitively given by any specific threshold for DInSAR or this technique. What is most important is that a consistent proxy is used so that apples-to-apples comparisons are made when inferring grounding line retreat. It would be good to make a point like this. |      | In response to Reviewer 3, we have endeavored to give a more absolute assessment of the accuracy of the TMOC method. See response to comment 3.2.                                                                                                                                                                                                             |          |
| 2.6 | Line 20. Since you don't match the retreat numbers to specific glaciers, remove “, respectively”.                                                                                                                                                                                                                                                                                                                                                                                               | 20   | <b>Done</b>                                                                                                                                                                                                                                                                                                                                                   | 20       |
| 2.7 | Line 25. In many cases the area above the grounding line is also dominated by longitudinal stresses and vertical shear has little effect. Lateral shear stress is often as if not more important than longitudinal stress in many cases on both sides of the grounding line. Maybe rephrase as the transition from the region influenced by basal shear stress to the region with no drag.                                                                                                      | 25   | Thank you for this clarification.<br><br><b>Done.</b> Changed to:<br><i>'transition between an inland flow regime influenced by basal shear stress, and a frictionless floating ice flow regime'</i>                                                                                                                                                          | 25       |

|      |                                                                                                                                                                                                                                                                                                                                             |     |                                                                                                                                                                   |     |
|------|---------------------------------------------------------------------------------------------------------------------------------------------------------------------------------------------------------------------------------------------------------------------------------------------------------------------------------------------|-----|-------------------------------------------------------------------------------------------------------------------------------------------------------------------|-----|
| 2.8  | Line 33: Here an numerous other places hyphenate “ice-sheet” when its used as an adjective “ice-sheet mass loss” but not when used as noun, “Antarctic Ice Sheet”.                                                                                                                                                                          | 33  | <b>Done</b>                                                                                                                                                       | 32  |
| 2.9  | Line 37 Add “,” before “which”                                                                                                                                                                                                                                                                                                              | 37  | <b>Done</b>                                                                                                                                                       | 37  |
| 2.10 | Line 41 “and the extent” break the sentence in two here.                                                                                                                                                                                                                                                                                    | 41  | <b>Done</b>                                                                                                                                                       | 41  |
| 2.11 | Line 43 “,” before “which”                                                                                                                                                                                                                                                                                                                  | 43  | <b>Done</b>                                                                                                                                                       | 42  |
| 2.12 | Line 46 “this point is followed”                                                                                                                                                                                                                                                                                                            | 46  | <b>Done</b>                                                                                                                                                       | 46  |
| 2.13 | Line 55 “ice-flow”                                                                                                                                                                                                                                                                                                                          | 55  | <b>Done</b>                                                                                                                                                       | 59  |
| 2.14 | Line 57 remote “state” the ice flow may be steady (the same over two periods), but not necessarily steady state (i.e, if the flow is causing thinning).                                                                                                                                                                                     | 57  | <b>Done</b>                                                                                                                                                       | 61  |
| 2.15 | Line 58. Break start a new sentence at “,” with the remaining” and add “differential” before “vertical”                                                                                                                                                                                                                                     | 58  | <b>Done</b>                                                                                                                                                       |     |
| 2.16 | Line 62. The data can be coherent but not suitable for mapping the GL. For example, the data can be well correlated but if the fringe rate exceeds the spatial sampling, the fringes are aliased even though they may remain coherent. Maybe say something about the data should be adequately sampled so that the fringes can be resolved. | 62  | <b>Done.</b> Changed to:<br><br>‘requirements for coherence between SAR acquisitions and well resolved interferometric fringes.’                                  | 64  |
| 2.17 | Line 71. A better reference than Joughin et al 2010b is Joughin et al 2016 <a href="https://doi.org/10.1002/2016GL070259">https://doi.org/10.1002/2016GL070259</a>                                                                                                                                                                          | 71  | <b>Done.</b><br><br>Thank you for the helpful suggestion.                                                                                                         | 77  |
| 2.18 | Line 78. Maybe say “slope-related shading effects”                                                                                                                                                                                                                                                                                          | 78  | <b>Done.</b>                                                                                                                                                      | 83  |
| 2.19 | Line 81. Strictly speaking Goldstein did not use DiNSAR since he only had a single interferogram. It happened to be one that with a relatively simple flow field so that GL was visible.                                                                                                                                                    | 81  | <b>Done.</b> Changed to:<br><br><i>‘InSAR and DInSAR mapping of the GL in Antarctica has been carried out using SAR data since 1992 (Goldstein et al., 1993)’</i> | 86  |
| 2.20 | Line 103: I think you mean “formerly” not “formally”                                                                                                                                                                                                                                                                                        | 103 | <b>Done</b>                                                                                                                                                       | 109 |
| 2.21 | Line 108: I think “sparse” is spelled the same way on both sides of the Atlantic (not sparce).                                                                                                                                                                                                                                              | 108 | <b>Done</b>                                                                                                                                                       | 114 |
| 2.22 | Line 110: Add a “,” after “methods”                                                                                                                                                                                                                                                                                                         | 110 | <b>Done</b>                                                                                                                                                       | 116 |
| 2.23 | Line 117. In general its good to have at least an introductory sentence between Level 1 and Level 2 heading (i.e., before 2.1 Physical Basis).                                                                                                                                                                                              | 117 | In this case we have chosen to remain with our exiting formatting.                                                                                                | 125 |
| 2.24 | Line 121. Don’t start a sentence with an acronym.                                                                                                                                                                                                                                                                                           | 121 | <b>Done.</b> Changed to:<br><br><i>‘The DROT method’</i>                                                                                                          | 127 |
| 2.25 | Line 122 after “range direction” add “(line of sight)”                                                                                                                                                                                                                                                                                      | 122 | <b>Done</b>                                                                                                                                                       | 128 |
| 2.26 | Line 122 “,” and the speed” start a new sentence here.                                                                                                                                                                                                                                                                                      | 122 | <b>Done</b>                                                                                                                                                       | 128 |
| 2.27 | Line 124 Don’t’ start with acronym. How about “There are several limitations with DROT;”                                                                                                                                                                                                                                                    | 124 | <b>Done</b>                                                                                                                                                       | 130 |



|      |                                                                                                                                                                                                                                                                                                                                                                                                                                                                                                                                               |     |                                                                                                                                                                                                                                                                                                                                                                                                                                                                                                                                                                                                                                                                                                                                                                                                                                            |     |
|------|-----------------------------------------------------------------------------------------------------------------------------------------------------------------------------------------------------------------------------------------------------------------------------------------------------------------------------------------------------------------------------------------------------------------------------------------------------------------------------------------------------------------------------------------------|-----|--------------------------------------------------------------------------------------------------------------------------------------------------------------------------------------------------------------------------------------------------------------------------------------------------------------------------------------------------------------------------------------------------------------------------------------------------------------------------------------------------------------------------------------------------------------------------------------------------------------------------------------------------------------------------------------------------------------------------------------------------------------------------------------------------------------------------------------------|-----|
| 2.28 | Line 125 add “,” before and after “, and hence, “                                                                                                                                                                                                                                                                                                                                                                                                                                                                                             | 125 | <b>Done</b>                                                                                                                                                                                                                                                                                                                                                                                                                                                                                                                                                                                                                                                                                                                                                                                                                                | 132 |
| 2.29 | Line 126. Be careful with terms like “feature tracking”. You are actually using a combination of speckle tracking and feature tracking here.                                                                                                                                                                                                                                                                                                                                                                                                  | 126 | <b>Done.</b> Changed to ‘Intensity feature tracking’ to be more specific.                                                                                                                                                                                                                                                                                                                                                                                                                                                                                                                                                                                                                                                                                                                                                                  | 133 |
| 2.30 | Line 126 remove “and”                                                                                                                                                                                                                                                                                                                                                                                                                                                                                                                         | 126 | <b>Done</b>                                                                                                                                                                                                                                                                                                                                                                                                                                                                                                                                                                                                                                                                                                                                                                                                                                | 133 |
| 2.31 | Line 127 change “...motion,” to “...motion; “                                                                                                                                                                                                                                                                                                                                                                                                                                                                                                 | 127 | <b>Done</b>                                                                                                                                                                                                                                                                                                                                                                                                                                                                                                                                                                                                                                                                                                                                                                                                                                | 134 |
| 2.32 | Line 132 add a “,” before “we conclude”                                                                                                                                                                                                                                                                                                                                                                                                                                                                                                       | 132 | <b>Done</b>                                                                                                                                                                                                                                                                                                                                                                                                                                                                                                                                                                                                                                                                                                                                                                                                                                | 139 |
| 2.33 | Line 151 add “,” before “and” or better yet make it a new sentence.                                                                                                                                                                                                                                                                                                                                                                                                                                                                           | 151 | <b>Done</b>                                                                                                                                                                                                                                                                                                                                                                                                                                                                                                                                                                                                                                                                                                                                                                                                                                | 159 |
| 2.34 | Line 155 Consider breaking this long sentence in two.                                                                                                                                                                                                                                                                                                                                                                                                                                                                                         | 155 | Thank you for the suggestion, but we have chosen to leave this unchanged.                                                                                                                                                                                                                                                                                                                                                                                                                                                                                                                                                                                                                                                                                                                                                                  | 164 |
| 2.35 | Line 161 Sentence “Speed measurements are ....” Its not clear what is meant here. Rephrase.                                                                                                                                                                                                                                                                                                                                                                                                                                                   | 161 | <b>Done.</b> Changed to: ‘ <i>Speed measurements are scaled according to</i> ’                                                                                                                                                                                                                                                                                                                                                                                                                                                                                                                                                                                                                                                                                                                                                             | 171 |
| 2.36 | Line 162-164. Remove “We select ....melt season” And start a new sentence first explaining melt effects. “Surface melt between....” Then a new sentence “Thus, we select only SAR images from winter periods” or something like that.                                                                                                                                                                                                                                                                                                         | 162 | <b>Done</b>                                                                                                                                                                                                                                                                                                                                                                                                                                                                                                                                                                                                                                                                                                                                                                                                                                | 172 |
| 2.37 | Line 176 add a “,” before “while”                                                                                                                                                                                                                                                                                                                                                                                                                                                                                                             | 176 | <b>Done</b>                                                                                                                                                                                                                                                                                                                                                                                                                                                                                                                                                                                                                                                                                                                                                                                                                                | 186 |
| 2.38 | Line 177. I don’t like the sentence “In the absence of noise...” Whenever you estimate a correlation, you get a random variable, not something that’s precisely 0. Moreover, with no noise, you might pick up subtle speed variations that correlate with the tide. I am more surprised that the threshold is as low as 0.1. So you don’t have to justify not using 0. Remove the sentences referencing 0. And just say something like “We found a threshold of 0.1 give a good balance between false and missed detections of grounded ice”. | 177 | <b>Done.</b> We have removed this sentence as suggested. This now reads:<br><br><i>‘This threshold is chosen, because we find it gives a good compromise between sensitivity and measurement noise. After contouring, we merge adjacent contour lines and remove isolated inland points to produce the final GL dataset. In the idealised case with zero measurement noise and no phase shift between tidal amplitude and ice motion, the zero contour would give the inland limit of flexure, point F, however due to measurement noise and contouring at a value of 0.1 we expect that the chosen GL location will be slightly seaward of point F, but substantially closer than the ~ 1km seaward bias expected from DROT (Friedl et al., 2020) due to the use of a time-series approach and a far greater number of observations.’</i> | 190 |
| 2.39 | Line 186: Add introductory text before 3.1                                                                                                                                                                                                                                                                                                                                                                                                                                                                                                    | 186 | In this case we have chosen to remain with our exiting formatting.                                                                                                                                                                                                                                                                                                                                                                                                                                                                                                                                                                                                                                                                                                                                                                         | 196 |
| 2.40 | Line 188: Read better if you say what “this” is. “This data set covers...”                                                                                                                                                                                                                                                                                                                                                                                                                                                                    | 188 | <b>Done</b>                                                                                                                                                                                                                                                                                                                                                                                                                                                                                                                                                                                                                                                                                                                                                                                                                                | 199 |
| 2.41 | Line 190: “These data” not “this data”                                                                                                                                                                                                                                                                                                                                                                                                                                                                                                        | 190 | <b>Done</b>                                                                                                                                                                                                                                                                                                                                                                                                                                                                                                                                                                                                                                                                                                                                                                                                                                | 201 |
| 2.42 | Line 203: Nothing wrong with “map” but how about “detect”                                                                                                                                                                                                                                                                                                                                                                                                                                                                                     | 203 | <b>Done.</b> Changed to ‘resolve’                                                                                                                                                                                                                                                                                                                                                                                                                                                                                                                                                                                                                                                                                                                                                                                                          | 213 |
| 2.43 | Line 209: Do you have a reference to backup this belief (i.e., most termini are grounded)?                                                                                                                                                                                                                                                                                                                                                                                                                                                    | 209 | <b>Done.</b> Added a citation to existing GL datasets:<br><br>(Bindschadler et al., 2011; Rignot et al., 2016; Mougnot et al., 2017)                                                                                                                                                                                                                                                                                                                                                                                                                                                                                                                                                                                                                                                                                                       | 218 |
| 2.44 | Line 244: Add a “,” before “we”                                                                                                                                                                                                                                                                                                                                                                                                                                                                                                               | 224 | <b>Done</b>                                                                                                                                                                                                                                                                                                                                                                                                                                                                                                                                                                                                                                                                                                                                                                                                                                | 235 |
| 2.45 | Line 251 “,” before “which”                                                                                                                                                                                                                                                                                                                                                                                                                                                                                                                   | 251 | <b>Done</b>                                                                                                                                                                                                                                                                                                                                                                                                                                                                                                                                                                                                                                                                                                                                                                                                                                | 262 |
| 2.46 | Line 263 Change “which” to “that”                                                                                                                                                                                                                                                                                                                                                                                                                                                                                                             | 263 | <b>Done</b>                                                                                                                                                                                                                                                                                                                                                                                                                                                                                                                                                                                                                                                                                                                                                                                                                                | 273 |

|      |                                                                                                                                                                                                                                                                                                                                                                                                   |     |                                                                                                                                                        |     |
|------|---------------------------------------------------------------------------------------------------------------------------------------------------------------------------------------------------------------------------------------------------------------------------------------------------------------------------------------------------------------------------------------------------|-----|--------------------------------------------------------------------------------------------------------------------------------------------------------|-----|
| 2.7  | Line 270. How about “These ambiguous regions..” rather than just “This...”                                                                                                                                                                                                                                                                                                                        | 270 | <b>Done.</b> Changed to:<br><br>‘These ambiguous regions likely reflect areas of highly changeable surface conditions, which cause...’                 | 281 |
| 2.48 | Line 274: Not sure why there is an initial in the Rignot citation.                                                                                                                                                                                                                                                                                                                                | 274 | <b>Done.</b>                                                                                                                                           | 285 |
| 2.49 | Line 274: Change “This might be expected, as fast...” to “This might be caused because fast...”<br>The issue is cause and effect concerning the glaciers, not what people might expect.                                                                                                                                                                                                           | 274 | <b>Done.</b> Changed to: ‘This may be explained because...’                                                                                            | 286 |
| 2.50 | Paragraph with Line 290. It might be good to say with either method a proxy for the grounding line is being used. No one can really say exactly where the grounding line is based on the fringes. Instead, what we have are educated guesses used to define conventions. The bias is not with respect to the true grounding line, but instead to the inland limit of fringes as used by MEASURES. | 290 | We have amended this section in response to Reviewer 3’s comment that accuracy should be assessed in a more absolute way. See response to comment 3.2. |     |
| 2.51 | Line 300: Spell out Grounding line when starting a sentence.                                                                                                                                                                                                                                                                                                                                      | 300 | <b>Done</b>                                                                                                                                            | 324 |
| 2.52 | Line 312 “Glaciers” remove the “”. It is not needed as written.                                                                                                                                                                                                                                                                                                                                   | 312 | <b>Done</b>                                                                                                                                            | 336 |
| 2.53 | Line 312 “respectively” should be “, respectively,”                                                                                                                                                                                                                                                                                                                                               | 312 | <b>Done</b>                                                                                                                                            | 337 |
| 2.54 | Line 316 “,” before “we”                                                                                                                                                                                                                                                                                                                                                                          | 316 | <b>Done</b>                                                                                                                                            | 341 |
| 2.55 | Line 340 “which” to “that”                                                                                                                                                                                                                                                                                                                                                                        | 340 | <b>Done</b>                                                                                                                                            | 365 |
| 2.56 | Line 345 Break sentence “... by TMOC. Following a comparison with .... DInSAR, we were...”                                                                                                                                                                                                                                                                                                        | 345 | <b>Done</b>                                                                                                                                            | 370 |
| 2.57 | Line 360: Add a sentence or two before 5.1                                                                                                                                                                                                                                                                                                                                                        | 360 | In this case we have chosen to remain with our exiting formatting.                                                                                     | 385 |
| 2.58 | <ul style="list-style-type: none"> <li>▪ Line 370: With short enough baselines so the phase could be unwrapped, you could apply your technique, which should be an improvement over single DInSAR.</li> </ul>                                                                                                                                                                                     | 370 | This is an interesting idea, but we have chosen not to include it, as other reviewers already recommended shortening the discussion section.           | 394 |
| 2.59 | <ul style="list-style-type: none"> <li>▪ Line 371: Rewrite to move acronym from starting the sentence.</li> </ul>                                                                                                                                                                                                                                                                                 | 371 | <b>Done</b>                                                                                                                                            | 395 |
| 2.60 | Line 530. Another overly long sentence break into 2 or even 3 pieces.                                                                                                                                                                                                                                                                                                                             | 530 | <b>Done</b>                                                                                                                                            | 562 |

Reviewer 3:

| ID  | Comment                                                                                                                                                                                                                                                                                                                                                                                                                                                                                                                                                                                                                                                                                                                                                                                                                                                                                                                                                                                                                                                                                                                                                                                                                                         | Line | Response                                                                                                                                                                                                                                                                                                                                                                                                                                                                                                                                                                                                                                                                                                                                                                                                                                                                                                                                                                                                                                                                                                                                                                                                                                                                                                                                                                                                                                                                                                                                                                                                                                                                                                                                                                                                                                     |          |
|-----|-------------------------------------------------------------------------------------------------------------------------------------------------------------------------------------------------------------------------------------------------------------------------------------------------------------------------------------------------------------------------------------------------------------------------------------------------------------------------------------------------------------------------------------------------------------------------------------------------------------------------------------------------------------------------------------------------------------------------------------------------------------------------------------------------------------------------------------------------------------------------------------------------------------------------------------------------------------------------------------------------------------------------------------------------------------------------------------------------------------------------------------------------------------------------------------------------------------------------------------------------|------|----------------------------------------------------------------------------------------------------------------------------------------------------------------------------------------------------------------------------------------------------------------------------------------------------------------------------------------------------------------------------------------------------------------------------------------------------------------------------------------------------------------------------------------------------------------------------------------------------------------------------------------------------------------------------------------------------------------------------------------------------------------------------------------------------------------------------------------------------------------------------------------------------------------------------------------------------------------------------------------------------------------------------------------------------------------------------------------------------------------------------------------------------------------------------------------------------------------------------------------------------------------------------------------------------------------------------------------------------------------------------------------------------------------------------------------------------------------------------------------------------------------------------------------------------------------------------------------------------------------------------------------------------------------------------------------------------------------------------------------------------------------------------------------------------------------------------------------------|----------|
| 3.1 | The proposed research approach is sound, interesting, and well-organized.                                                                                                                                                                                                                                                                                                                                                                                                                                                                                                                                                                                                                                                                                                                                                                                                                                                                                                                                                                                                                                                                                                                                                                       |      | We thank the reviewer for their positive assessment.                                                                                                                                                                                                                                                                                                                                                                                                                                                                                                                                                                                                                                                                                                                                                                                                                                                                                                                                                                                                                                                                                                                                                                                                                                                                                                                                                                                                                                                                                                                                                                                                                                                                                                                                                                                         |          |
| 3.2 | <p>However, I am afraid the authors may be, in some ways, overstating the results and the capabilities of the proposed method. For instance when they claim: “the method performs well compared to highly precise DInSAR GL measurements, with a mean offset between these data of 185 m and a standard deviation of 295 m” they assess the presence of a bias in their data, but they do not address the actual accuracy of the technique itself.</p> <p>For instance, Single DInSAR Interferogram grounding line measurements have an accuracy of about +/- 300 m when locating grounding lines.</p> <p>The proposed technique could most likely map grounding lines within +/- 1-2 km accuracy. This is because of the Sentinel-1 pixel size, the accuracy of pixel tracking technique itself, and the inaccuracies due to the non-accurate CATS model near the grounding line together with the coarse resolution of IBE corrections. Finally, this technique assumes no horizontal velocity changes during the observation period which can also affect the correlation with tidal levels.</p> <p>I would like these numbers to be specified in the text in order to better characterize the applicability of the presented technique.</p> |      | <p>We acknowledge the reviewer’s concerns that the accuracy of the method presented in this study should be described as comprehensively as possible. We have endeavored to do this transparently with the extensive intercomparison described in section 3.2.</p> <p>We believe that the CATS2008 tide model and sea-level pressure data from ERA5 reanalysis represent the best publicly available input data for our method.</p> <p>The limitation of not accounting for short term ice speed changes was already raised in the manuscript in Section 5.1 line 397. We have expanded this sentence to read:</p> <p><i>‘...our method does not account for short term variability in ice speed, such as seasonal speed changes (Boxall et al., 2022; Wallis et al., 2023a) or rapid ice flow accelerations, which create range velocity anomalies that confound the tidal signal.’</i></p> <p>As the reviewer suggests we have included the measurement error associated with DInSAR grounding line delineations, using the figure of <math>\pm 100</math> m quoted by Rignot et al., 2011. Combining this uncertainty in quadrature with the bias plus standard deviation of our method gives an accuracy for our TMOC method of <math>\pm 490</math> m.</p> <p>We have added the following text to describe this:</p> <p><i>‘Assuming that the 2019 DInSAR GL is the best dataset to accurately validate the performance of the TMOC GL method, we estimate that TMOC places the GL <math>185 \pm 295</math> m seaward of the DInSAR GL location. When the upper limit of this bias and variability is combined with a standard error of DInSAR GL delineations of <math>\pm 100</math> m (Rignot et al., 2011), we estimate the TMOC method can locate the grounding line position with an accuracy of <math>\pm 490</math> m.’</i></p> | 421, 311 |
| 3.3 | Most importantly, all the grounding line retreat rates of the same magnitude of the grounding line mapping accuracy (i.e. anything slower than 1 to 2 km/yr retreat) would lose statistical                                                                                                                                                                                                                                                                                                                                                                                                                                                                                                                                                                                                                                                                                                                                                                                                                                                                                                                                                                                                                                                     |      | The reviewer makes a valid point that over a single year retreat rates less than the measurement uncertainty can not be resolved. However, it is the absolute grounding line position change between                                                                                                                                                                                                                                                                                                                                                                                                                                                                                                                                                                                                                                                                                                                                                                                                                                                                                                                                                                                                                                                                                                                                                                                                                                                                                                                                                                                                                                                                                                                                                                                                                                         | 536      |

|     |                                                                                                                                                                                                                                                                                                   |    |                                                                                                                                                                                                                                                                                                                                                                                                                                                                                                                                                                                                                                                                                                                                                                                                                                                                                                                                                                                                            |    |
|-----|---------------------------------------------------------------------------------------------------------------------------------------------------------------------------------------------------------------------------------------------------------------------------------------------------|----|------------------------------------------------------------------------------------------------------------------------------------------------------------------------------------------------------------------------------------------------------------------------------------------------------------------------------------------------------------------------------------------------------------------------------------------------------------------------------------------------------------------------------------------------------------------------------------------------------------------------------------------------------------------------------------------------------------------------------------------------------------------------------------------------------------------------------------------------------------------------------------------------------------------------------------------------------------------------------------------------------------|----|
|     | significance. This should be specified in the discussion and the conclusions.                                                                                                                                                                                                                     |    | <p>measurements, not the rate of change, which is the limiting factor. Retreat rates on the order of the measurement uncertainty per year could be resolved if they are sustained over a multi-year temporal baseline.</p> <p>We agree that this point could be better developed and quantified in the manuscript, so we have added the following the discussion:</p> <p><i>'Mappings of GL position using the TMOC method would be suitable to measure changes in GL position which exceed the combined uncertainty of two TMOC GL measurements, excluding the seaward offset with respect to DInSAR GLs, which would be approximately constant between TMOC measurements. This gives TMOC the capability to resolve GL retreat rates of greater than 418 m/yr between measurements for two adjacent years or 83 m/yr if this were sustained for 5 years.'</i></p>                                                                                                                                        |    |
| 3.4 | Line 43-45 No reference to a figure where point F or G are located.                                                                                                                                                                                                                               | 43 | <p>We made an active choice not to include a diagram very similar to those induced in many other papers on grounding lines (Smith, 1991; Vaughan, 1994; Fricker et al., 2009; Brunt et al., 2010, 2011; Dawson and Bamber, 2017). The readership of the Cryosphere who will be interested in this paper have already seen this diagram many times and our description does not add any new perspective from the diagrams in the referenced papers. Therefore, we do not believe it to be necessary or that it would benefit the manuscript to reproduce these figures verbatim.</p> <p>We have instead added a sentence to explicitly refer the reader to the referenced material for a visual depiction and the majority of these article are open access:</p> <p><i>'Schematics showing the cross section of a grounding zone are widely available in the literature (Smith, 1991; Vaughan, 1994; Fricker et al., 2009; Brunt et al., 2010, 2011; Dawson and Bamber, 2017; Friedl et al., 2020)'</i></p> | 48 |
| 3.5 | Lines 72-74 The sensitivity of the pixel offset mapping method also depends on the Radar pixels size. Achievement displacement accuracies are usually 1/8 of the radar pixel size (De Zan 2014)<br>De Zan, F. (2013). Accuracy of incoherent speckle tracking for circular Gaussian signals. IEEE | 72 | <p><b>Done.</b> We have amended this line to read:</p> <p><i>'The performance of the method is dependent on the sensitivity of the offset tracking results, determined by the range direction pixel size; and the magnitude of the tide amplitude in the study region.'</i></p>                                                                                                                                                                                                                                                                                                                                                                                                                                                                                                                                                                                                                                                                                                                            | 77 |

|     |                                                                                                   |     |                                                                |       |
|-----|---------------------------------------------------------------------------------------------------|-----|----------------------------------------------------------------|-------|
|     | Geoscience and Remote Sensing Letters, 11(1), 264-267.                                            |     |                                                                |       |
| 3.6 | Figure 1C is confusing, A straight line does not give the idea of when images have been acquired. | 131 | <b>Done.</b> We have added markers to this figure for clarity. | Fig 1 |

# Change in grounding line location on the Antarctic Peninsula measured using a tidal motion offset correlation method

Benjamin J. Wallis<sup>1</sup>, Anna E. Hogg<sup>1</sup>, Yikai Zhu<sup>2,3</sup>, Andrew Hooper<sup>2</sup>

<sup>1</sup>School of Earth and Environment, University of Leeds, United Kingdom

5 <sup>2</sup>COMET, School of Earth and Environment, University of Leeds, United Kingdom

<sup>3</sup>Chinese Antarctic Centre of Surveying and Mapping, Wuhan University, China

*Correspondence to:* B.J. Wallis (eebjwa@leeds.ac.uk)

**Abstract:** The grounding line position of glaciers and ice shelves is an essential observation for the study of the Earth's ice sheets. However, in some locations, such as the Antarctic Peninsula, where many grounding lines have not been mapped since  
10 the 1990s, remote sensing of grounding line position remains challenging. Here we present a tidal motion offset correlation (TMOC) method for measuring the grounding line position of tidewater glaciers and ice shelves, based on the correlation between tide amplitude and synthetic aperture radar offset tracking measurements. We apply this method to the Antarctic Peninsula Ice Sheet to automatically delineate a new grounding line position for 2019-2020, with near complete coverage along 9,300 km of coastline, updating the 20-year-old record. A comparison of the TMOC grounding line to contemporaneous  
15 interferometrically-measured grounding line position shows the method has a mean seaward offset compared to interferometry of 185 m and a standard deviation of 295 m. Our results show that over the last 24 years there has been grounding line retreat at a number of fast flowing ice streams on the Antarctic Peninsula, with the most retreat concentrated in the north-eastern sector, where grounding lines have retreated following the collapse of ice shelves. We observe a maximum grounding line retreat since 1996 of  $16.3 \pm 0.5$  km on Hektor Glacier, with other notable glaciers retreating by  $9.3 \pm 0.5$  km,  $9.1 \pm 0.5$  km,  
20 and  $3.6 \pm 0.5$  km respectively. Our results document dynamic change on Antarctic Peninsula glaciers and show the importance of using an updated grounding line location to delineate the boundary between floating and grounded ice.

## 1 Introduction

The boundary between grounded ice resting on bedrock or sediments and floating ice, the grounding line (GL), is a key glaciological parameter essential for understanding the behaviour of marine terminating land ice. The GL location influences  
25 ice dynamics because it marks the transition between an inland flow regime ~~controlled by vertical shear stress and influenced by~~ basal ~~shear stress drag~~, and a frictionless floating ice flow regime ~~controlled by longitudinal stresses~~. Accurate knowledge of the GL is a boundary condition required for both modelling of ice sheets and glaciers in small domain specialised models and large Earth system models used to project future ice-sheet behaviour and sea-level rise contributions (Vieli and Payne, 2005; Pattyn et al., 2006; Pattyn, 2018; Cornford et al., 2020), and for calculations of observational datasets including ice shelf  
30 basal melting (Rignot et al., 2013; Paolo et al., 2015; Gourmelen et al., 2017) and ice mass discharge, which is required as an input dataset for mass balance calculations using the input output method (Mouginot et al., 2014; Gardner et al., 2018; Rignot

et al., 2019; Davison et al., 2023). Change in the GL location over time is a sensitive indicator of ice-sheet mass balance and stability, where GL retreat is associated with increased ice discharge and ice-sheet mass loss (Joughin et al., 2012; Rignot et al., 2014; Joughin et al., 2016). Furthermore, GL retreat on retrograde bed slopes can cause a positive feedback leading to further retreat through the process of marine ice-sheet instability (Schoof, 2007).

Rather than having a fixed location, the grounding line is a transitory feature which constantly changes over short (daily) and longer term (decadal) timescales. It is located within a wider grounding zone, which characterises the larger area (1 – 10 km wide) where the transition from grounded ice to complete hydrostatic equilibrium occurs (Smith, 1991; Vaughan, 1994; Fricker et al., 2009; Brunt et al., 2010, 2011). Within this zone the true GL where grounded ice loses contact with the bed can migrate with changing sea-level caused by ocean tides and atmosphere pressure variations by the inverse barometer effect (IBE) and. The extent of this migration is additionally controlled by bed topography, ice thickness and ice rheology (Jonathan and R, 1994; Brunt et al., 2010; Padman et al., 2018). This is further complicated by non-linear tidal migrations, which can show threshold and hysteresis behaviour (Milillo et al., 2022; Freer et al., 2023). The grounding zone is made up of several features; the most inland of these is the landward limit of ocean induced ice flexure, point F, also known as the hinge line, which is located slightly inland of the true GL, point G, due to the elastic properties of ice (Vaughan, 1994; Rignot et al., 2011; Padman et al., 2018). In the seaward direction this point is followed by the break in surface slope, point I<sub>b</sub>, and the landward limit of stable hydrostatic equilibrium, point H. Additionally, in locations where there is an ice plain at the grounding zone, point I<sub>b</sub> may be located inland of the GL, point G (Corr et al., 2001; Brunt et al., 2011). Schematics showing the cross section of a grounding zone are widely available in the literature (Smith, 1991; Vaughan, 1994; Fricker et al., 2009; Brunt et al., 2010, 2011; Dawson and Bamber, 2017; Friedl et al., 2020). The true grounding line is a sub-glacial feature, so cannot be directly detected by satellite remote sensing measurements, which must instead measure surface expressions which are proxies for the GL or are used to deduce the GL position. For the purposes of this study, we use the term ‘grounding line’ to refer to the inland limit of the grounding zone identified by remote sensing methods, and we are explicit about which grounding zone feature this refers to where required.

Several methods exist for measuring grounding line location and mapping grounding zone features from satellite remote sensing data. The most accurate method is to use synthetic aperture radar interferometry (InSAR) (Goldstein et al., 1993; Rignot, 1996, 1998; Joughin et al., 2010a; Rignot et al., 2011; Joughin et al., 2016; Rignot et al., 2016), where repeat-pass, phase sensitive synthetic aperture radar (SAR) measurements are used to create interferograms, which measure phase difference in the radar line of sight. Interferograms of the grounding zone show fringing caused by horizontal ice-flow displacements, with the GL visible as a dense pattern of fringes, which represent phase change caused by large vertical ocean tide. When two interferograms are differenced, fringes caused by steady-state ice flow that are consistent in both measurements are removed to form a double-difference interferogram. With the remaining fringes are caused by vertical displacement of the floating ice surface due to ocean tides, which do not remain constant over the same time period (Rignot, 1996, 1998). The inland limit of these fringes denotes the inland limit of ice tidal flexure, point F the grounding line (Rignot et al., 2011).

65 While highly accurate, the major limitations of the differential SAR interferometry (DInSAR) technique for  
grounding line measurements ~~is~~are the requirements for coherence between SAR acquisitions and well resolved  
interferometric fringes. This must be achieved while operating within the constraints of current missions' acquisition plans.  
This particularly impacts measurements in locations where the ice surface changes rapidly, for example due to precipitation  
and surface melting, or in regions of fast ice flow and high deformation. Other remote sensing techniques that do not rely on  
70 InSAR coherence have also been used to map GL positions; these include measuring tidal elevation change through repeat  
measurements by altimeter satellite instruments ICESat (Fricker and Padman, 2006; Fricker et al., 2009; Brunt et al., 2010;  
Xie et al., 2016), ICESat-2 (Li et al., 2020, 2022), and CryoSat-2 (Dawson and Bamber, 2017, 2020), which along with  
DInSAR GL fringe delineation are dynamic methods that locate ~~point F and other~~ grounding zone features by measuring  
vertical ice motion in response to short-term local sea-level variation. A small number of studies have used a technique called  
75 differential range offset tracking (DROT), a dynamic technique which measures vertical tidal motion in SAR imagery through  
intensity feature tracking rather than interferometry, to ~~observe point F on~~map the GL on individual glaciers of interest in  
regions without interferometric coherence (Marsh et al., 2013; Hogg, 2015; Joughin et al., 2016). The performance of the  
method is dependent on the sensitivity of the offset tracking results, determined by the range direction pixel size; radar  
frequency which determines the sensitivity to change in slant range path length caused by vertical displacement of the ground  
80 surface, and the magnitude of the tide amplitude in the study region. GL position measurements can also be made using static  
methods which do not measure ice motion, for example by measuring the break in surface slope, point I<sub>b</sub>, either from radar  
altimetry (Partington et al., 1987; Herzfeld et al., 1994; Jonathan and R, 1994; Fricker et al., 2000; Hogg et al., 2018), laser  
altimetry (Herzfeld et al., 2008; Bindschadler et al., 2011) and DEMs (Stearns, 2011; Rott et al., 2020), or from slope-related  
shading in optical satellite images (Scambos et al., 2007; Bindschadler et al., 2011).

85 In the satellite remote sensing era, these techniques, or combinations thereof, have been used to map grounding line  
position and change across the Antarctic Ice Sheet (AIS). InSAR and DInSAR mapping of the GL in Antarctica has been  
carried out using SAR data since 1992 (Goldstein et al., 1993), producing GL datasets for the entire continent from a  
combination of satellites (Rignot et al., 2011, 2013, 2016; Mouginot et al., 2017). Additionally, in 2018, GL maps in Antarctica  
from Sentinel-1 SAR data were produced using deep learning to automate the fringe delineation process (Mohajerani et al.,  
90 2021), greatly increasing the volume of GL data produced by removing the need for manual delineation. Repeat track laser  
altimetry has been used to map grounding zone features in Antarctica from ICESat-2 data (Li et al., 2020, 2022) complementing  
earlier studies, and radar altimetry from CryoSat-2 has produced continent-wide GL and grounding zone feature mapping  
through both a dynamic pseudo-radar-crossover approach (Dawson and Bamber, 2020) and a static surface slope approach  
(Hogg et al., 2018). Photoclinometry which measures the change in surface slope from surface shading has been used to  
95 measure the GL, and was combined with laser altimetry in the Antarctic Surface Accumulation and Ice Discharge (ASAID)  
project to produce continent wide GL and hydrostatic line dataset (Bindschadler et al., 2011). There is a recognised requirement  
for monitoring the location of ice sheet GL's due to their importance as an indicator of ice-sheet stability, for the interpretation  
of other observations, and modelling glacier and ice-sheet behaviour (Joughin et al., 2012; Bojinski et al., 2014). However,



despite significant progress, no method provides continuous monitoring of the GL around the whole Antarctic coastline with high-spatial sampling at regular time intervals.

Here, we develop a new method for measuring the grounding line location, which we call tide motion offset correlation (TMOC), this uses correlation of Sentinel-1 range direction intensity feature tracking data with an ocean tide mode, and apply it to measure the GL location on the Antarctic Peninsula (AP) in 2019-2020. The AP consists of an ice-sheet-covered mountainous spine running north to south, with a coastline fringed by ice shelves totalling 110,000 km<sup>2</sup> in area in 2021 (Greene et al., 2022). The ice shelves are clustered on the east and southwest coasts and, by contrast, the west coast north of 70°S is dominated by tidewater glaciers. Observed ice mass losses on the Peninsula have been substantial; ice shelves lost an area of 28,000 km<sup>2</sup> between 1947 and 2008 (Cook and Vaughan, 2010), a trend which continued with observed losses of 20,500 km<sup>2</sup> between 1997 and 2021 (Greene et al., 2022). The collapse of ice shelves has increased ice discharge from glaciers that were formerly buttressed by the shelf (Rignot et al., 2004; Scambos et al., 2004; Rott et al., 2011; Seehaus et al., 2016; Friedl et al., 2018) and the widespread retreat of tidewater glaciers has been linked to warming ocean temperatures on the west coast (Cook et al., 2016). Overall, from 1992 to 2020 the Antarctic Peninsula Ice Sheet (APIS) has been responsible for 14 % of Antarctica's total sea-level rise contribution (Shepherd et al., 2018; Ootosaka et al., 2023).

Despite the AP being a highly dynamic and rapidly changing region of Antarctica, grounding line location measurements are sparse in time, and few direct observations of GL change have been made because the region poses significant challenges for established GL measurement methods. For DInSAR there are a number of areas of the AP which have persistently low InSAR coherence. For repeat altimetry-based methods, the ground track spacing is largest at lower latitude locations such the AP which reduces the spatial resolution of GL products, and persistent cloudy weather limits the number of successful laser altimetry retrievals. For these reasons, many parts of the AP coastline have not been measured using high-precision tide-sensitive GL methods since the Ice and Tandem Phases of ERS-1/2 in 1991-1996, or from a combination of static photogrammetry (1999-2003) and repeat track laser altimetry (2003-2008) from the ASAD GL product. More recent GL measurements have been made for case studies of individual glaciers (Friedl et al., 2018; Rott et al., 2020), however, these examples are rare, and the majority of the over 860 glaciers on the AP remain un-surveyed for over 20 years.

## 2 Tidal Motion Offset Correlation (TMOC) Method

### 2.1 Physical Basis

The existing DROT method exploits the off-nadir viewing geometry of SAR sensors to measure motion of the ice surface in the range direction that is induced by the vertical displacement of floating ice with different ocean tide amplitudes between image acquisitions. The DROT method utilises intensity feature tracking ice speed measurements in the range direction. A minimum of two range direction (line of sight) speed maps are produced using 3 or 4 separate SAR acquisitions, and the speed maps are subsequently differenced to remove the constant horizontal ice flow component, which leaves only the motion due to vertical movement of the ice between acquisitions plus measurement noise. There are several limitations of DROT

several limitations; it is significantly less sensitive to around an order of magnitude less sensitive vertical motion than DInSAR, and hence, places point F seaward of the DInSAR measured position, because the tidal displacement signal must be greater than the measurement noise of intensity feature tracking; and like DInSAR, individual results may not sample the full range of tidal motion; and results must still be manually interpreted and delineated (Friedl et al., 2020).

135 We present a newly developed technique, Tidal Motion Offset Correlation (TMOC), for measuring the grounding zone of glaciers and ice shelves using the same measurement principle as DROT, but substantially extending the methodology with a time-series approach. The method measures the correlation between the range direction speed time-series and a time-series of modelled tide amplitude with a correction for atmospheric pressure; where these time-series have a strong and statistically significant correlation, we conclude the ice must be floating and hence is seaward of the grounding line.

140 As in the DROT case, the apparent ground range direction displacement for a vertical displacement  $\Delta\zeta$  and incidence angle  $\theta_i$  is given by (Joughin et al., 2010b; Marsh et al., 2013; Friedl et al., 2020):

$$\Delta S = \frac{\Delta\zeta}{\tan\theta_i} \quad (1)$$

In this equation,  $\theta_i$  is dependent on the location of the satellite and surface topography. However, for a specific location where SAR viewing geometries are approximately fixed (i.e. a time-series of a single Sentinel-1 frame), this is a linear function of vertical displacement. Therefore, we can calculate correlation between range direction ice speed and atmospherically-corrected tide height without the need to calculate the expected tidally induced velocity signal.

145 Figure 1 demonstrates the principles of the TMOC method for two points, Point A on the grounded ice of the Jason Peninsula and Point B on the Larsen B Ice Shelf remnant in the Scar Inlet (Fig. 1a). Comparing anomalies in range direction displacement in 2019 to modelled differential tide height with an inverse barometer effect (IBE) correction derived from ERA5 hourly sea-level pressure (Hersbach et al., 2023, 2020), we find that displacement anomalies at the floating Point B are strongly correlated ( $R = 0.982$ ,  $p < 0.05$ ) with differential tide amplitude between the SAR image acquisitions used in the offset tracking result (Fig. 1b). This correspondence is also shown by comparing the time series of range displacement anomalies (Fig. 1c) to the time series of differential tide height (Fig. 1d).

## 2.2 Algorithm Description

155 The input data required for the TMOC GL method are time-series of ice speed observations in the range direction, modelled tide amplitude and sea-level atmospheric pressure. We measure range direction ice speed using frequency domain cross correlation feature tracking between Sentinel-1 synthetic aperture radar (SAR) interferometric-wide (IW) mode images (Strozzi et al., 2002). This tracking is performed in range-azimuth radar geometry using a cross-correlation window size of 256 x 64 pixels (range x azimuth) and a step size of a quarter window. ~~and w~~ We take the range component of these results and geocode the results at 100 m postings using the 200 m REMA DEM (Howat et al., 2019, 2022). ~~For tidal motion, we use the CATS2008 Antarctic tide model (Howard et al., 2019), which includes tides in ice shelf cavities~~ ~~For tidal motion, we use~~

~~the CATS2008 Antarctic tide model, an update to the model described in Padman et al. (2002) (King et al., 2011), which includes tides in ice shelf cavities,~~ to model tide displacement at 1 km resolution over the whole SAR image domain at the time of every SAR acquisition used in the range speed timeseries. We interpolate these tide displacement predictions to the 100 m posting grid used for ice speed measurements using linear interpolation within the CATS2008 domain and nearest neighbour interpolation outside to produce a tide prediction for the entire image domain, including ice that is grounded in the CATS2008 model. For sea-level atmospheric pressure we use ERA5 hourly sea level pressure data (Hersbach et al., 2020, 2023), which we also interpolate to the 100 m ice speed grid for the time of each Sentinel-1 acquisition.

We form a time-series of range direction ice speed at each grid location from all available 6- and 12-day Sentinel-1 tracking pairs acquired between 1<sup>st</sup> April and 1<sup>st</sup> October of a given year or combination of years. Speed measurements are scaled according to their temporal baseline to account for different tracking pair separations. ~~We select SAR images from the winter months only to avoid the influence of the summer melt season, where s~~Surface melt between image acquisitions can cause vertical displacement of the radar scattering horizon within the firn pack leading to a measurement artefact that appears similar to the range direction motion we seek to detect (Rott et al., 2020). Therefore, we select SAR images from the winter months only, to avoid the influence of the summer melt season. We also form a time-series of the differential tide height, plus a correction for the inverse barometer effect at 1cm/kPa (Padman et al., 2003). We calculate the Pearson correlation coefficient between these two time-series at every grid point in the Sentinel-1 frame, along with the significance value of this correlation. This procedure produces maps of correlation coefficient ( $R$ ) between range direction ice speed and tide plus IBE vertical displacement, and the significance value of this coefficient  $P_{corr}$ .

We post-process both maps using a Butterworth lowpass filter of order two followed by an adaptive Wiener filter to remove high frequency noise from the results and remove pixels with fewer than 10 velocity tracking results. To account for the statistical significance of the correlation result we multiply the correlation coefficient map by  $(1 - P_{corr})$  to calculate a significance adjusted  $R'$ ; where the statistical significance of the correlation is high this does not substantially modify  $R$  but does filter out high correlation values with low significance. We then form a mosaic of the scaled correlation coefficient map for the Antarctic Peninsula region from 24 Sentinel-1 frames and produce a grounding line position by contouring this mosaic at a threshold of  $R' > 0.1$ , while masking areas above 200 m altitude in the REMA Antarctic DEM. This threshold is chosen, because we find it gives a -as-a-good compromise between sensitivity and measurement noise. ~~In the absence of any measurement noise a threshold of 0 should correctly map the GL at the most inland position, however, choosing 0 retains noise in the GL delineation, particularly in low tide amplitude areas such as the AP's west coast, so instead we use 0.1 to give smooth delineation of the GL.~~ After contouring, we merge adjacent contour lines and remove isolated inland points to produce the final GL dataset. In the idealised case with zero measurement noise and no phase shift between tidal amplitude and ice motion, the zero contour would give the inland limit of flexure, point F, however due to measurement noise and contouring at a value of 0.1 we expect that the chosen GL location will be slightly seaward of point F, but substantially closer than the  $\sim 1$ km seaward bias expected from DROT (Friedl et al., 2020) due to the use of a time-series approach and a far greater number of observations.

### 3 Antarctic Peninsula Grounding Line for 2019-20

#### 3.1 TMOC grounding line mapping

We use the TMOC algorithm to process all Sentinel-1 frames acquired between April 1<sup>st</sup> 2019 and September 1<sup>st</sup> 2019, and April 1<sup>st</sup> 2020 and September 1<sup>st</sup> 2020, over the Antarctic Peninsula. This [dataset](#) covers the region from Joinville Island at the northern tip to the southern edge of George VI Ice Shelf on the west coast, and to the edge of the Ronne Ice Shelf on the east coast (a full list of Sentinel-1 frames used is given in Table S1). We used [theseis](#) data to produce a map of tidal motion correlation for the Antarctic Peninsula, with a time stamp of 2019 – 2020 (Fig. 2). For all measurements with respect to the coastline, we use the British Antarctic Survey Antarctic Coastline 7.2 vectors, released May 2020, for a contemporary coastline to our measurements (Gerrish, Laura, 2020).

We use this dataset to automatically delineate 9,300 km of the AP's grounding line and resolve all the AP's ice shelves, including the small shelves and shelf remnants such as Seal Nunataks (Fig. 2b), Larsen-B remnant (Fig. 2c.), Muller Ice Shelf on the Arrowsmith Peninsula and minor ice shelves on Alexander Island's Beethoven Peninsula. In general, correlation values are highest on the eastern ice shelves, with values above 0.9 for Larsen-B remnant, Larsen-C and Larsen-D Ice Shelves, while values are lower on the western ice shelves, between 0.6 and 0.8 for Wilkins, Bach, and George VI Ice Shelves. In addition to the GL, on ice shelves on both sides of the AP we are able to resolve the boundaries and therefore areas of islands, nunataks, ice rises and pinning points with a high level of detail. For example, we delineate all of the Seal Nunataks (Fig. 2b) except the smallest, Åkerlund Nunatak, which is only 100 m wide – the size of one pixel at our mapping resolution. On Larsen-C, we [map-resolve](#) large islands such as Francis and Tonkin Islands, ice rises including the important Bawden and Gipps Ice Rises, which mark the eastward extent of the shelf, and small nunataks like the 0.3 km<sup>2</sup> Table Nunatak, adjacent to the Kenyon Peninsula. On the west coast, despite lower tidal amplitudes we also successfully resolve small features on George VI Ice Shelf including the Martin Ice Rise and the southern margin pinning points around Eklund Islands (Fig. 2e.). On Wilkins Ice Shelf we resolve dense and complex clusters of pinning points, such as the Petrie Ice Rises.

Although, [according to existing grounding line datasets](#) (Bindschadler et al., 2011; Rignot et al., 2016; Mougnot et al., 2017), most glaciers on the peninsula outside the ice shelves are thought to be tidewater glaciers, which calve at their grounding line and have no floating tongue, we can resolve floating sections of a number of glaciers on both sides of the peninsula and measure the length of their floating tongues. On the east coast, glaciers with floating tongues are observed in the embayments of disintegrated ice shelves, such as in the Larsen-B embayment, where Crane Glacier (4.0 km tongue) and the Hektor-Green-Evans (HGE) glacier system (12.3 km) are located, and in the Larsen-A embayment the Edgeworth-Bombardier-Dinsmoor (EBD) Glacier system (10.7 km). On the west coast of the AP, we detect floating termini at Hoek Glacier (1.4 km), Splettstoesser Glacier (1.7 km), and the Fleming-Airy-Seller glacier system (8.8 km), and on Alexander Island's north coast, Hampton Glacier (6.0 km) and Roberts Ice Piedmont (4.3 km). On this coast, the small ice shelf (6 x 2.5 km) of Cadman Glacier is not well resolved and only has patches of significant correlation close to the GL, however, we attribute this to the rapid acceleration (1,000 m/yr) that the glacier and ice shelf underwent in 2019 (Wallis et al., 2023b).

230 The TMOC method is also suitable for the identification of ephemerally grounded features; i.e. those which are grounded at low tidal amplitudes but which can become ungrounded at high tides (Zhong et al., 2023). In floating areas where there is a local minimum of tidal correlation, but not reaching our 0.1 threshold for grounding line delineation we interpret these as sites of ephemeral grounding. Examples of such features are seen around the grounding zone of the Larsen-B remnant close to Leppard and Flask Glaciers (Fig. 1c) and along the east and west margins of George VI Ice Shelf (Fig. 1e).

### 3.2 Evaluation and Intercomparison

235 To evaluate the performance of the TMOC method, we directly compared contemporaneously produced TMOC and DInSAR grounding line products. We produced differential interferograms from Sentinel-1 acquisitions in 2019 (Table S2) covering the Larsen-B remnant, Larsen-C, Larsen-D and George VI Ice Shelves, and we manually delineated the inland limit of the grounding zone using established methods. A comparison between the TMOC and DInSAR GL datasets in a region of relatively static ice on Larsen-C Ice Shelf in the Stratton Inlet shows the performance of the TMOC algorithm and the characteristics of the output datasets at the local scale (Fig. 3). This comparison shows that the TMOC GL location agrees very well with DInSAR for the location of the GL and also is able to resolve an ice rise in the north margin of the Stratton inlet where the fringe pattern is ambiguous and, therefore, accurately identifying this feature from DInSAR alone would be difficult. InSAR coherence (Fig. 3c) is also a useful quantity for identifying grounding zone features as it is often high on grounded ice and ice shelves in hydrostatic equilibrium, but much lower in the grounding zone where the ice is deforming and displacing due to tidal motion (Gray et al., 2002). We extracted a transect through the grounding zone of the Stratton Inlet from both the InSAR coherence and TMOC tide correlation data (Fig. 3e), which illustrates that the grounding zone features identified by DInSAR are also resolved by the TMOC method. The transect also illustrates that the TMOC GL method successfully identifies grounding zone point F (Fig. 3e) as the tide correlation begins rapidly increasing from its minimum at the same point that InSAR coherence begins to fall, although the requirement to contour our results at  $R = 0.1$  for reliable performance means that our method places the GL slightly seaward of point F.

We evaluated the performance of our TMOC algorithm quantitatively through a comparison to grounding line locations derived from a number of DInSAR datasets in five sectors of the AP region: the Larsen-B remnant, Larsen-C Ice Shelf, Larsen-D Ice Shelf, and the east and west sides of George VI Ice Shelf. For contemporaneous GL measurements, we use manual GL delineations of differential interferograms generated for this study from Sentinel-1 acquisitions in austral winter 2019. This data is impacted by low coherence in some areas and coverage is limited to the eastern margin of the Larsen-B remnant, most of Larsen-C excluding some of the faster glaciers, a section of Larsen-D and the western margin of George VI Ice Shelf. For approximately contemporaneous GL measurements produced independently of this study we use the European Space Agency (ESA) Antarctic Ice Sheet Climate Change Initiative (CCI) project GL location data, choosing the most recent data for each comparison area (ESA Antarctic Ice Sheet Climate Change Initiative, 2021). This provides GL measurements from 2015-2017 covering the Larsen-B remnant and Larsen-C, excluding some fast glaciers, however no data is available for Larsen-D Ice Shelf or George VI Ice Shelf. We also compare our TMOC results with the MEaSURES Antarctic Boundaries

Version 2 (MABv2) GL (Rignot *et al.*, 2013, Mouginot *et al.*, 2017), which is a composite of DInSAR GL measurements from 1992 to 2015 complemented by other GL measurements to provide a continuous GL around the Antarctic Ice Sheet. The advantage of intercomparing our TMOC GL to the MABv2 GL is that it provides full coverage across the study region and is the Antarctic GL most commonly used in the glaciology community. However, in regions with persistently low SAR coherence, such as fast flowing glaciers feeding ice shelves and the eastern margin of George VI Ice Shelf, these DInSAR measurements are notably out of date because they were produced using data acquired during the ice or tandem phases of ESA's ERS-1 and ERS-2 satellites from 1992 to 1996, when shorter 3 and 1-day repeat periods ensured higher coherence.

To perform the intercomparison between our TMOC method and these three DInSAR GL datasets, we label the line with the most complete coverage as the 'reference line' and the other the 'test line'. We measure the shortest distance from the test point to the reference line at 1 km spaced points, and we calculate the sign (seaward or inland) of this distance by comparing the directions of the vector between the test point and the closest location on the reference line. This procedure produces a distribution of signed offsets between the two datasets ~~which that~~ are averaged, with the standard deviation also calculated (Fig. 4, Table 1).

This inter-comparison shows that the highest agreement is found between the TMOC and MABv2 grounding line along the western boundary of George VI Ice Shelf, where the mean seaward offset is 0.6 m. The lowest agreement is measured on the Larsen-C Ice Shelf where mean seaward offset between the TMOC and MABv2 GL's is 262 m. The distribution of offsets is also variable between the different comparison areas, with minimum standard deviation of 415 m for the Larsen-C GL and maximum of 1450 m for the eastern margin of George VI Ice Shelf. On George VI Ice Shelf this distribution of offsets is dominated by a small number of regions where there are large ambiguities around relatively localised features (Fig. 4e, 4f). ~~These ambiguous regions is~~ likely reflects ~~areas of the~~ highly changeable surface conditions ~~of this region~~, which causes low coherence in most interferograms and makes intensity feature tracking difficult, particularly on the ice streams of western Palmer Land. By contrast, on the Peninsula's eastern ice shelves there is a smaller standard deviation of the offsets between the TMOC and MABv2 GL. Here we find that the seaward offset of the TMOC GL with respect to MABv2 (mean 165 m) is positively correlated ( $R = 0.430$  to  $0.576$ ,  $p < 0.05$ ) with ice speed (Rignot, ~~E.~~ *et al.*, 2017). This ~~might be expected, may be explained because as~~ fast flowing glaciers tend to have the thickest ice and deepest grounding zones, making tidally-induced vertical motion more complex, out of phase with tides, and difficult to detect against fast horizontal motion. Overall, in the whole intercomparison covering 3,409 km of AP coastline, the mean seaward offset and standard deviation of the TMOC GL compared to MABv2 is  $164 \text{ m} \pm 803 \text{ m}$ .

Our comparison between the TMOC GL and contemporaneously acquired Sentinel-1 DInSAR GLs (CCI 2015-2017 and this study 2019), which have more limited spatial coverage, show a small seaward offset, where zero offset falls within one standard deviation of the offset (Table 1). When the TMOC GL is compared to the 2015-2017 CCI GLs we measure seaward offsets of  $233 \pm 428 \text{ m}$  for the Larsen-B remnant and  $438 \pm 502 \text{ m}$  for the Larsen-C Ice Shelf, with no DInSAR coverage in the other comparison regions. A comparison of the TMOC GL to 2019 DInSAR GLs produced for this study gives the only truly contemporaneous comparison between our new technique and established methods, providing partial coverage

for all comparison areas except George VI East. We observe smaller seaward offsets between TMOC and the 2019 DINSAR dataset in comparison to the CCI GL data, ranging from  $135 \pm 548$  m for the Larsen-D Ice Shelf to  $198 \pm 316$  m for the Larsen-C Ice Shelf.

We make a further comparison between our 2019-20 TMOC GL and DInSAR using GL automatically delineated with deep learning from all available Sentinel-1 DInSAR from the year 2018 (Mohajerani et al., 2021). This analysis is limited to a qualitative basis, because the available data are the set of GL delineations from all available interferograms, so there is not a definitive GL for a quantitative comparison without a further manual interpretation. We find that our TMOC GL is almost always within the distribution of GLs from Mohajerani et al.'s data, between the most inland and most seaward measured locations (Supplementary Figure 1). This comparison also highlights where the TMOC method can produce a grounding line measurement where 6-day repeat Sentinel-1 DInSAR cannot, for example in on Flask and Leppard Glaciers in the SCAR inlet (Supplementary Figure 1b), and Western Palmer Land (Supplementary Figure 1d). These results further support our conclusion that the TMOC GL position is located slightly seaward of the DInSAR GL position, if the most inland limit of DInSAR fringes observed in a given period is considered to be the best measurement of the grounding line position.

In summary, we find that the TMOC grounding lines have a small seaward offset compared to DInSAR GLs in the Antarctic Peninsula region, ranging from  $0.6 \pm 836$  m to  $438 \pm 502$  m. In all comparison areas for all datasets except the Larsen-B remnant in 2019 DInSAR, we find that zero seaward offset is within the standard deviation of offsets. Assuming that the 2019 DInSAR GL is the best dataset to accurately validate the performance of the TMOC GL method, we estimate that TMOC places the GL  $185 \pm 295$  m seaward of the DInSAR GL (~~point F~~) location. When the upper limit of this bias and variability is combined with a standard error of DInSAR GL delineations of  $\pm 100$  m (Rignot et al., 2011), we estimate the TMOC method can locate the grounding line position with an accuracy of  $\pm 490$  m.

## 4 Change in Grounding Line Location

### 4.1 Grounding Line Retreat

Our 2019-2020 TMOC dataset can be used to study change in grounding line position (Point F) on the Antarctic Peninsula in locations where low DInSAR coherence and unfavourable satellite altimeter track spacings mean there has been a paucity of GL measurements in recent decades. A key region in this regard is the north-east coast of the Antarctic Peninsula where the Prince Gustav, Larsen-A and Larsen-B Ice Shelves collapsed or partially collapsed in the 1990s and early 2000s (Rott et al., 1996; Rack and Rott, 2004; Rignot et al., 2004; Cook and Vaughan, 2010). The glaciers in these former ice shelf embayments have exhibited ice dynamic variability in the 20 years following the collapse, with satellite observations showing both ice speed and surface elevation change (Rott et al., 2011, 2018). ~~Grounding line~~ position measurements in this period of dynamic change have been sparse for the major glaciers, including Crane and the Hektor-Green-Evans (HGE) Glaciers in Larsen-B, Drygalski and the Edgeworth-Bombardier-Dinsmoor Glacier system in Larsen-A and Sjørgen Glacier in the Sjørgen Inlet. The most recent GL measurements for any of these glaciers in either the MEASUREs or CCI datasets is from 1996, and from static

330 methods there is the ASAlD GL dataset which corresponds to Landsat-7 images from 1999-2003. A more recent study produced GL locations for HGE in 2013 and 2016 and Crane Glacier in 2016 by interpreting surface slope and surface elevation change from InSAR DEMs (Rott et al., 2020).

We compared our 2019-20 TMOc GL to the composite MEaSUREs Antarctic Boundaries v2 (MABv2) GL dataset (Mouginot et al., 2017) (Fig. 5, Table S3) and MEaSUREs timestamped DInSAR GL (Rignot et al., 2016) (Fig. S1, Table S3) to measure grounding line change. The largest GL retreat occurred on the Hektoria-Green-Evans Glacier system (Fig. 5b), where the GL of Hektoria Glacier has retreated along the central flowline by  $16.3 \pm 0.5$  km since 1996, and GL retreat of  $11.7 \pm 0.5$  km is measured between the 2019-20 TMOc and the MABv2 GL data, which does not have a singular timestamp. Our TMOc results also show that the GLs on both Green and Evans Glaciers<sup>2</sup> have retreated by  $9.3 \pm 0.5$  km and  $6.7 \pm 0.5$  km, respectively, relative to their 1996 position. Our results on Hektoria Glacier are in agreement with 2016 GL measurements from a more recent study (Rott et al. 2020), which show a maximum inland GL ~~retreat-position~~ of  $0.5 \pm 0.5$  km in comparison to our TMOc data. On Crane Glacier the changes are more complex. The TMOc measurements show that the 2019-20 GL has retreated by  $3.6 \pm 0.5$  km compared to the 1996 DInSAR position, but is  $1.0 \pm 0.5$  km advanced from the MABv2 GL. Further north in the Larsen-A Embayment, we observe that the GLs of Edgeworth and Dinsmoor Glaciers (Fig. 5c) have retreated by  $9.1 \pm 0.5$  km and  $4.2 \pm 0.5$  km compared to the MEaSUREs Antarctic Boundaries v2 GL (no timestamped DInSAR was available) (Table S3). Finally, outside of the north-east Peninsula, we also observe GL retreat of Vivaldi Glacier in the Schubert Inlet of Wilkins Ice Shelf, where the GL has retreated by  $2.2 \pm 0.5$  km compared to 1995 DInSAR. This result at Vivaldi Glacier is confirmed by comparison to automatically delineated 2019 DInSAR GLs (Mohajerani et al., 2021), which are available in this area and show the same pattern of change.

#### 4.2 Pinning Points and Grounding Zone Features

Our TMOc dataset is also suitable for the study of pinning points and ice rises underneath ice shelves (Fig. 6). We evaluate the performance of the TMOc method by comparing pinning points and ephemeral grounding features in our dataset to pinning points in the MEaSUREs Antarctic Boundaries v2 (MABv2) grounding line dataset (Mouginot et al., 2017). We classify pinning points in one of three ways based on their visibility in the two datasets, InSAR only, Tide only or InSAR and Tide. We apply a more stringent criteria to tide only points than InSAR and tide, requiring them to be delineated at the 0.1 correlation coefficient threshold we use to map the GL to be classified as tide only points, whereas for InSAR and tide points we classify a local minimum in the tidal correlation located at an InSAR derived pinning point to be sufficient, (Fig. 6c). We do not include large islands nunataks, or very large ice rises in this analysis.

Our results show that on the AP the TMOc data can be used to identify and map 112 pinning points, including 22 new features that are not included in the MABv2 GL dataset. Of the 114 pinning points in MABv2, 90 are found in our TMOc data and 24 are not, which may suggest that the missing features have either become ungrounded in the period between the two measurements, or that the sensitivity of the TMOc method was not sufficient to detect them. An example of the good



performance of the TMOC dataset for resolving pinning points can be found at the Mill Inlet on the Larsen-C Ice Shelf (Fig. 6c). At the southern side of the inlet our data resolves four pinning points found in the MABv2 GL, but also identifies two additional pinning points and shows the shape of these sub-ice shelf features. New pinning points are found on all of the Peninsula's major ice shelves, for example on Larsen-D in the Smith Inlet (Fig. 6d) we identify a series of pinning points ~~which that~~ were not identified in any MEaSURES or ESA CCI DInSAR GL products. It is possible that these points were not previously identified using interferometric techniques because they are close to a region of high shear on the Larsen-D Ice Shelf which leads to low SAR coherence. Even in regions of low tidal amplitude on the Peninsula's east coast our method is still suitable for studying pinning points, for example at the southern margin of George VI Ice Shelf (Fig. 6d) where we identify new pinning points close to the grounding line of CryoSat Ice Stream. On George VI Ice Shelf we also found two pinning points from the MABv2 dataset which were not detected by TMOC. ~~however, following~~ a comparison with our 2019 contemporaneous DInSAR, we were able to confirm that these features were not measured by this method either, suggesting its more likely that the ice shelf has become ungrounded in this location.

In addition to pinning points appearing or disappearing, the change in area of pinning points and ice rises can also be measured by TMOC, which is a useful indicator of change in ice shelf thickness, where an increase in area corresponds to ice shelf thickening and reducing area to ice shelf thinning (Miles and Bingham, 2024). A good example of this is shown by the TMOC data for Seal Nunataks (Fig. 6b), where the pinning point area has decreased in comparison to the MABv2 indicating the thinning of this ice shelf remnant. The reduction in pinning point area on the Seal Nunataks is also confirmed by comparison to the ESA CCI DInSAR GL data for 2017. While it is possible that some proportion of the area difference should be attributed to differences in measurement techniques between the two time periods, our peninsula-wide statistical analysis suggests that the TMOC GL will have a small seaward bias in comparison to interferometrically produced datasets (Fig. 4), therefore, the inland retreat is more likely due to real glaciological change, which would also fit in with our broader knowledge of ice shelf collapse and thinning on the AP (Shepherd et al., 2003; Rack and Rott, 2004).

## 5 Discussion

### 5.1 Comparison to other non-InSAR grounding line remote sensing methods

We have demonstrated the high spatial coverage and accuracy of our TMOC grounding line data through comparison to DInSAR GLs from a number of sources. DInSAR still provides the most accurate method of measuring the inland limit of grounding zone deformation (point F) due to its high sensitivity to vertical displacement and its fine spatial resolution, and therefore remains the benchmark against which any novel GL method should be evaluated. However, as there are many regions where DInSAR GL measurements have not been possible since the 1990s, it is essential to have other methods to map change in GL location that can be used where interferometric coherence is not present. On the Antarctic Peninsula, previous studies have used Pseudo Crossover Radar Altimetry (PCRA) (Dawson and Bamber, 2017, 2020), Repeat Track Laser Altimetry

(RTLA) and crossover analysis (Li et al., 2020, 2022), and break in surface slope methods (Bindschadler et al., 2011; Hogg et al., 2018).

395

~~Pseudo Crossover Radar Altimetry PCRA~~ was used to measure the location of points F and H across the Antarctic Ice Sheet, including the Larsen-C Ice Shelf on the Antarctic Peninsula (Dawson and Bamber, 2017, 2020), using eight years of CryoSat-2 radar altimetry from 2010-2017. On Larsen-C this method had an average seaward bias of -0.1 km (i.e. a landward bias of 0.1 km) and a standard deviation in this bias of 1.2 km compared to ESA CCI DInSAR data, and coverage of the AP region was 11 %. Similarly, RTLA was used to measure the location of grounding zone features first on the Larsen-C Ice Shelf and Larsen-B Ice Shelf remnant (March 2019 – March 2020) and later across the AIS (March 2019 – September 2020) (Li et al. 2020). Compared to ESA CCI GL data in the Larsen-C region, these studies find a mean absolute difference in the location of point F of 0.39 km with a standard deviation of 0.32 km. A later comparison of the Antarctic wide ICESat-2 product to a dataset of automatically delineated DInSAR GLs found a mean absolute separation in point F of 0.02 km with a standard deviation of 0.02 km, both in the Larsen-C region and across the whole Antarctic continent. We find that the performance of TMOG GL versus those produced from DInSAR for the ESA CCI AIS project is comparable to the performance of PCRA and RTLA versus the CCI data, while providing improved coverage compared to these datasets. The TMOG mean seaward offset against 2015-2017 CCI GL data is 0.41 km  $\pm$  0.50 km, for PCRA this is -0.1 km  $\pm$  1.2 km and for RTLA 0.39 km  $\pm$  0.32 km.

400

405

410

415

420

425

The strengths of TMOG, DInSAR and these altimetry-based methods should be seen as complementary; PCRA and RTLA provide grounding line measurements at the most southerly margins of Antarctica's Ross and Filchner-Ronne Ice Shelves, where no Sentinel-1 SAR acquisitions can be made due to the satellite's orbital limit, and perform best in these locations where altimetry tracks are most densely concentrated. Altimeter methods do not perform as well at lower latitude locations, such as the Antarctic Peninsula, due to wider track spacings, which cause lower spatial resolution, but it is here where TMOG excels due to complete SAR coverage and the method's ability to resolve small grounding zone features in regions where low coherence makes DInSAR ineffective. In addition to the limitations imposed by the acquisition pattern of Sentinel-1, our TMOG method is less effective in regions with 12-day repeat periods because there are fewer measurements to form a time-series and the tidal range offset anomaly is halved in magnitude compared to the optimal 6-day repeat. With the upcoming launch of Sentinel-1c the 6-day repeat acquisitions should be restored, but again this demonstrates the value of operational, short repeat period SAR data acquisitions over the ice sheets. The effectiveness of the TMOG method is also impacted by the tidal range at the target location, where higher tide amplitudes deliver a better quality result. However, we still achieve good performance on the west AP where rms tide height is 40-50 cm compared to 90-100 cm on the east coast (Padman et al., 2002). Similarly, our method does not account for short term variability in ice speed, such as seasonal speed changes (Boxall et al., 2022; Wallis et al., 2023a) or rapid ice flow accelerations, which create range velocity anomalies that confound the tidal signal. Close to the grounding zone of thick ice shelves and ice streams, the motion of the ice may be substantially out of phase with the ocean tide away from the GZ and hence our nearest neighbour interpolation from the CATS2008 tide model may not be optimal. In future studies this method could be improved by incorporating an elastic or

visco-elastic beam model to improve estimates of point F from the observed correlation and through improved filtering of short-term velocity signals based on knowledge of where seasonal velocity variation or major dynamic changes have occurred.

## 5.2 Benefits of TMOC grounding line data

430 Accurate and up-to-date GL locations are key not only as a measure of ice-sheet and glacier stability, but also as parameters for the interpretation of other observations and as inputs to modelling studies. On the Antarctic Peninsula our new 2019-2020 TMOC dataset provides a complete grounding line for the region and updated data for many locations where GL position has not been measured since the late 1990s or early 2000s.

The need for up-to-date publicly-available GL datasets to aid the interpretation of other remote sensing measurements is well documented in the scientific literature, for example, in the study of rapid dynamic change on Antarctic Peninsula glaciers (Tuckett et al. 2019). In this study, short-term increases in ice velocity were observed on five glaciers including 435 Hektoria, Crane and Jorum Glaciers in the Larsen-B embayment. This change in ice speed was linked to the drainage of supraglacial lake meltwater to the glacier bed, providing a mechanism for AP glaciers response to atmospheric warming, similar to that which we know to be widespread on the Greenland Ice Sheet (Sundal et al., 2011). There was constructive debate in the scientific literature (Rott et al. 2020) about whether the use of an outdated GL position may have affected the 440 conclusions drawn (Tuckett et al. 2019). More recent GL positions measured using the surface slope of TanDEM-X DEMs and surface elevation change data between 2013 and 2016 showed that two thirds of ice velocity sample locations were located on floating rather than grounded ice, meaning that meltwater drainage from these locations could not lubricate the flow of ice by the proposed mechanism (Tuckett et al. 2019). An alternative GL measurement (Tucket et al., 2020), produced using the surface slope of the Reference Elevation Model of Antarctica (average date 2015) (Howat et al., 2019), suggests conversely 445 that the majority of the ice velocity sample locations were located on grounded ice. Furthermore, this follow-on study argued that velocity measurements on floating ice do not invalidate the proposed forcing mechanism. On Hektoria Glacier our TMOC 2019/20 GL measurements agree most closely with the TanDEM-X 2016 GL (Rott et al., 2020) (Fig. S1), although without a concurrent measurement, it is not possible to definitively know over which time period GL retreat to this position occurred. Overall, it is clear the paucity of grounding line measurements contributed to the difficulty in analysing the dynamic behaviour 450 of glaciers on the AP in this case, and so there is a need for tidally-sensitive methods and more regular GL measurements in these rapidly evolving locations.

Grounding line position measurements are essential for calculations of ice-sheet mass balance through the Input-Output Method (IOM) and for altimetry measurements because these calculations must differentiate between changes on the grounded ice sheet which contribute to sea-level rise and changes on the floating ice which do not. In the case of the IOM, the 455 GL position is required to locate the fluxgate, where ice discharge across the GL is measured. If fluxgates are erroneously placed seaward of the GL, then discharge calculations will be inaccurate, as basal melting, surface mass processes on floating ice and incorrect ice thickness may impact the result. For altimetry studies of ice-sheet surface elevation change or ice shelf thickness change, whether ice is floating, or not, greatly affects the data processing methods, such as the choice of which

geophysical corrections should be applied to the point elevation data. Knowledge of the GL is also important for interpretation  
460 of observed surface elevation change, such as determining which areas are included in the drainage basin total mass loss, due  
to the fact that floating ice in hydrostatic equilibrium changes elevation by approximately a factor of ten compared to grounded  
ice. Updated GL measurements from this study will be useful inputs to future studies of this nature, which may improve the  
accuracy of AP ice mass balance estimates, contributing to a reduction in the uncertainty of sea-level rise contributions.

Finally, modelling studies also require the GL position as an input dataset for the initialisation of model domains  
465 when assimilating observational datasets. In the AP region there are a number of examples where modelling studies depend  
on accurate GL locations, including glaciological processes case studies (Surawy-Stepney et al., 2023), projections of future  
change under different warming scenarios (Barrand et al., 2013), and calculating glacier bed topography by modelling ice  
thickness (Huss and Farinotti, 2014).

### 5.3 Grounding line change as an indicator of ice dynamics on the Antarctic Peninsula

470 Updated 2019/20 grounding line positions for the Antarctic Peninsula from our TMOC method have shown that GL retreat  
has occurred since the last period of widespread GL mapping on the AP in the 1990s and early 2000s. The observed GL retreat  
was concentrated in the north-eastern sector of the AP in the embayments of the collapsed Prince Gustav, Larsen-A and Larsen-  
B Ice Shelves, where we observe a maximum GL retreat of  $16.3 \pm 0.5$  km since 1996 ( $0.68 \pm 0.02$  km/yr) on Hektor Glacier  
(Fig. 5b, Supplementary Fig. 2+b). We also observe instances of GL retreat on the west coast of the Peninsula on Vivaldi  
475 Glacier feeding the Wilkins Ice Shelf and at Fleming Glacier, an observation which confirms the results of Friedl et al. (2018),  
and the loss of ice shelf pinning points at the southern margin of George VI Ice Shelf.

The GL change observed in the Larsen-A and -B Embayments is particularly noteworthy given the ongoing dynamic  
evolution of these glaciers in response to the collapse of Larsen-A Ice Shelf in 1995, Larsen-B in 2002, and more recent  
changes which have been observed through to, and after, the 2019/20 period (Ochwat et al., 2023; Surawy-Stepney et al.,  
480 2023). In the Larsen-B Inlet, Crane Glacier and the HGE system have differing evolutions since the collapse of the Larsen-B  
Ice Shelf. For HGE from 2011 to 2016, the grounded component of the glacier system thinned by up to 10 m/yr (Rott et al.,  
2018) and thinning continued from 2018 to 2021 (Needell and Holschuh, 2023; Ochwat et al., 2023). Crane Glacier also  
thinned inland from 2011 to 2013, however, from 2013 to 2016 the lower portion of Crane Glacier thickened. This trend was  
accompanied by a decrease in ice speed from 3.9 m/d in September 2011 to 2.4 m/d in October 2016 (Rott et al., 2018) and  
485 this trend continued to 2021 (Needell and Holschuh, 2023; Ochwat et al., 2023). The differing grounding line position evolution  
of the HGE system and Crane Glacier in this period offers an explanation for this divergent behaviour. Compared to the GL  
measured by Rott et al. for 2016, we find the GL of the HGE Glacier system is approximately unchanged from 2016 to 2019/20,  
but for Crane Glacier we find the GL has advanced by  $4.5 \pm 0.5$  km in this period. This measurement of advance of Crane  
Glacier's GL should be interpreted with some caution, because it compares two different techniques measuring GL position  
490 change over a relatively short period of time and both the DEM (Rott et al., 2020) and TMOC techniques may be less accurate  
than DInSAR delineations from the 1990s. However, this grounding line advance is plausible because the bed of Crane Glacier

is retrograde in this section, becoming shallower in the seaward direction (Fretwell et al., 2013). We can interpret these different behaviours as being possible evidence for two contrasting regimes: Crane Glacier, where the GL has been advancing on a retrograde bed from at least 2016 to 2019/20, causing the lower glacier to thicken, and Hektor-Green-Evans Glacier system, where the GL has been approximately static or retreating over the same period.

Since the 2019/20 period, for which our TMOC GL is dated, the glaciers of the Larsen-A and -B Embayments have continued to evolve, and our grounding line measurements provide insight into the causes of these changes. In January 2022, the multi-year landfast sea-ice in Larsen B embayment disintegrated and this event was followed by a major retreat and acceleration of Crane and the Hektor-Green-Evans glacier system (Ochwat et al., 2023; Surawy-Stepney et al., 2023). The largest retreat was observed on Hektor Glacier, which retreated by approximately 25 km between March 2022 to April 2023. Our GL position results show that the calving front position of Hektor Glacier on 29<sup>th</sup> March 2023 was between 1 ± 0.5 km and 2.5 ± 0.5 km inland of the 19/20 GL position, demonstrating that the majority of this retreat occurred on floating glacier tongue. On Crane Glacier the calving front position in March 2023 closely matches the 2019/20 GL, showing a similar total collapse of the floating ice tongue. In the Larsen A inlet from 2020 to April 2022, the Edgeworth-Bombardier-Dinsmoor glacier system also retreated by 8.3 ± 0.5 km, with the three glaciers separating and the calving fronts of Dinsmoor and Bombardier retreating to their 19/20 GL position. Notably in contrast, Drygalski Glacier in Larsen A embayment, where we do not detect any floating ice, did not retreat significantly in this 2022/23 period, showing that large ice front retreat in this area was limited to glaciers with substantial floating ice tongues. The similarity of the retreat of the Larsen B glaciers and the EBD system in the Larsen-A inlet raises the possibility that, in addition to sea ice changes, larger scale ocean and atmospheric forcings also played a role in the recent evolution of the Larsen A and B embayment glaciers.

Understanding how the grounding line position of glaciers in the Larsen-A and -B Embayments evolve during a large ice dynamic event is important, because Crane Glacier's retreat after the collapse of Larsen-B Ice Shelf was posited as an observational example of marine ice cliff instability (Edwards et al., 2019, Meredith et al., 2019, Oppenheimer et al., 2019.). A study revisiting this event 20 years later (Needell and Holschuh, 2023) noted that there is disagreement regarding the position of the pre-collapse GL between remote sensing DInSAR observations of tidal flexure from the period (Rack and Rott, 2004) and post-collapse marine geophysical surveys (Rebesco et al., 2014) which affects the interpretation of Crane's 2002-2004 post-collapse retreat. The continued monitoring of these highly dynamic glacier systems, which are exposed to extreme forcing events, has the potential to provide insights into ice dynamic processes relevant to the future evolution of the whole Antarctic Ice Sheet, but these observations will require accurate knowledge of the geometry of the system to be interpreted correctly and with confidence.

On the west coast of the AP, observations have shown that glaciers can be vulnerable to grounding line retreat across retrograde bed slopes or loss of grounding from bed ridges, causing ice flow acceleration, increased ice discharge and mass loss (Wallis et al., 2023b, Friedl et al., 2018). Studies have linked the retreat of glaciers on the west AP to forcing by warming ocean waters, which enhance melt rates and can cause GL retreat through intensified melting at the grounding zone. On the whole AP, monitoring GL change can provide important insight to understand how ocean warming is affecting the evolution

of glaciers and the remaining southerly ice shelves. Up-to-date GL position measurements can identify where glaciers are situated on retrograde bed slopes, such as Fleming Glacier, and hence are vulnerable to rapid grounding line retreat and ice mass loss, such as the 1 km/yr speed increase observed on Cadman Glacier in 2019 (Wallis et al., 2023b).

#### 5.4 Systematic monitoring of Antarctic grounding line change

530 In this study we used 2 years of Sentinel-1 SAR offset tracking data covering the period 2019-20 to produce a  
grounding line dataset for the Antarctic Peninsula Ice Sheet. However the TMOC method could be extended to a time-series  
of annual GL measurements using individual years of Sentinel-1 data. Presently, this is not possible, because the TMOC  
algorithm requires a 6-day repeat period for optimum performance and the failure of Sentinel-1B in December 2021 increased  
repeat times to 12-days across Antarctica. However, after the launch of Sentinel-1C, the TMOC method could be used to make  
535 systematic and continuous measurements of the AP GL, extending the data record and providing longer multi-year temporal  
baseline comparisons to monitor GL change in previously difficult-to-measure locations. Mappings of GL position using the  
TMOC method would be suitable to measure changes in GL position which exceed the combined uncertainty of two TMOC  
GL measurements, excluding the seaward offset with respect to DInSAR GLs, which would be approximately constant  
between TMOC measurements. This gives TMOC the capability to resolve GL retreat rates of greater than 418 m/yr between  
540 measurements for two adjacent years or 83 m/yr if this were sustained for 5 years.

For full and comprehensive mapping of the grounding line of the Antarctic Ice Sheet and sub-regions, such as the  
Antarctic Peninsula Ice Sheet, the best results are likely to be achieved through the combinations of multiple datasets derived  
from independent remote sensing measurements. Our TMOC method provides the capability to delineate GL location  
accurately and reliably through the direct measurement of tidal motion in regions of low, or no, InSAR coherence, addressing  
545 a major limitation of DInSAR methods. The planned launch of new L-band SAR missions, NASA and ISRO's NISAR (Rosen  
et al., 2017; Das et al., 2022) and ESA's ROSE-L (Davidson et al., 2021), will also provide new opportunities for grounding  
line monitoring using DInSAR and the TMOC method presented in this study. -We recommend that in future, TMOC GL data  
can be used to complement DInSAR GL delineations by providing coverage and monitoring in regions of persistent low  
coherence. Combined with other non-SAR grounding line remote sensing techniques, such as RTLA and PCRA described  
550 above, this would provide the most accurate dataset for monitoring grounding line and pinning point change across the AIS.

#### 6 Conclusions

We have developed a tidal motion offset correlation (TMOC) method for measuring the GL position, using the correlation  
between anomalies from range direction offset featuring tracking in synthetic aperture radar imagery and modelled tidal  
555 amplitudes. We apply this method to the Antarctic Peninsula where contemporary measurements of grounding line position  
are sparse, and demonstrate that the method performs well compared to highly precise DInSAR GL measurements, with a

mean offset between these data of 185 m and a standard deviation of 295 m. Our results show that TMOC provides excellent grounding line coverage in regions of persistently low SAR coherence and can detect small grounding zone features, such as pinning points and nunataks. From this data, we produce a complete grounding line dataset for the Antarctic Peninsula from the Ronne Ice Shelf to George VI Ice Shelf, including Alexander Island, valid for 2019/20.

Our results show that this grounding line dataset can be used to measure change in GL position on the Antarctic Peninsula. ~~We~~ we report examples of grounding line retreat which are largely concentrated in the north-east sector of the AP, including glaciers which formerly fed the Prince Gustav, Larsen-A and Larsen-B Ice Shelves, which remain dynamically imbalanced. We find a maximum GL retreat of  $16.3 \pm 0.5$  km on Hektor Glacier compared to the most recent DInSAR measurements from 1996. Overall, our results demonstrate that TMOC is a powerful new method for measuring grounding line location in an automated way, which addresses shortfalls in existing techniques in a complementary manner. The technique has the potential to greatly enhance the availability of regular GL measurements, particularly in complex regions such as the Antarctic Peninsula. When used alongside existing methods, such as DInSAR and repeat altimetry, it represents significant progress toward the goal of persistent monitoring of change in the grounding line location on the Antarctic Ice Sheet.

570

*Code Availability.* The code to implement the TMOC method will be made available at a public repository upon acceptance of this manuscript. For the purpose of review an illustrative version is available under the EGU sphere reviewer assets~~can be provided by the corresponding author upon request.~~

575 *Data Availability.* The Antarctic Peninsula tide correlation map and Peninsula-wide 2019-20 grounding line position data will be made available at a public repository upon acceptance of this manuscript. For the purpose of review these ~~can be provided by the corresponding author upon request~~ are available under the EGU sphere reviewer assets.

580 *Author Contributions.* B.J.W. and A.E.H. designed this study, B.J.W. developed the TMOC algorithm, wrote the code, implemented the method and processed the ice velocity data to produce the TMOC data and grounding line. Y.Z. produced the DInSAR interferograms and Y.Z. and B.J.W. produced the manually delineated DInSAR grounding lines. B.J.W. and A.E.H. wrote the manuscript, B.J.W. produced the figures, and all authors contributed to scientific discussion and revisions of the manuscript.

*Competing Interests.* The authors declare that they have no conflicts of interest.

585 *Acknowledgements.* The authors gratefully acknowledge the European Space Agency (ESA) and the European Commission for the acquisition and availability of Copernicus Sentinel-1 data. Funding is provided to B.J.W. by the Panorama Natural Environment Research Council (NERC) Doctoral Training Partnership (DTP), under grant NE/S007458/1. Funding is provided to A. E. H., by ESA via the ESA Polar+ Ice Shelves project (ESA-IPL-POE-EF-cb-LE-2019-834) and the SO-ICE project (ESA AO/1-10461/20/I-NB) which both are part of the ESA Polar Science Cluster; and from NERC via the DeCadeS project (NE/T012757/1) and the UK EO Climate Information Service (NE/X019071/1). COMET is the UK NERC Centre for the Observation and Modelling of Earthquakes, Volcanoes and Tectonics, a partnership between UK Universities and the  
590 British Geological Survey.



## References

- 595 Barrand, N. E., Hindmarsh, R. C. A., Arthern, R. J., Williams, C. R., Mouginot, J., Scheuchl, B., Rignot, E., Ligtenberg, S. R. M., Broeke, M. R. V. D., Edwards, T. L., Cook, A. J., and Simonsen, S. B.: Computing the volume response of the Antarctic Peninsula ice sheet to warming scenarios to 2200, *Journal of Glaciology*, 59, 397–409, <https://doi.org/10.3189/2013JoG12J139>, 2013.
- 600 Bindschadler, R., Choi, H., Wichlacz, A., Bingham, R., Bohlander, J., Brunt, K., Corr, H., Drews, R., Fricker, H., Hall, M., Hindmarsh, R., Kohler, J., Padman, L., Rack, W., Rotschky, G., Urbini, S., Vornberger, P., and Young, N.: Getting around Antarctica: new high-resolution mappings of the grounded and freely-floating boundaries of the Antarctic ice sheet created for the International Polar Year, *The Cryosphere*, 5, 569–588, <https://doi.org/10.5194/tc-5-569-2011>, 2011.
- 605 Bojinski, S., Verstraete, M., Peterson, T. C., Richter, C., Simmons, A., and Zemp, M.: The Concept of Essential Climate Variables in Support of Climate Research, Applications, and Policy, *Bulletin of the American Meteorological Society*, 95, 1431–1443, <https://doi.org/10.1175/BAMS-D-13-00047.1>, 2014.
- Boxall, K., Christie, F. D. W., Willis, I. C., Wuite, J., and Nagler, T.: Seasonal land ice-flow variability in the Antarctic Peninsula, *The Cryosphere Discussions*, 1–37, <https://doi.org/10.5194/tc-2022-55>, 2022.
- 610 Brunt, K. M., Fricker, H. A., Padman, L., Scambos, T. A., and O’Neel, S.: Mapping the grounding zone of the Ross Ice Shelf, Antarctica, using ICESat laser altimetry, *Annals of Glaciology*, 51, 71–79, <https://doi.org/10.3189/172756410791392790>, 2010.
- Brunt, K. M., Fricker, H. A., and Padman, L.: Analysis of ice plains of the Filchner–Ronne Ice Shelf, Antarctica, using ICESat laser altimetry, *Journal of Glaciology*, 57, 965–975, <https://doi.org/10.3189/002214311798043753>, 2011.
- Cook, A. J. and Vaughan, D. G.: Overview of areal changes of the ice shelves on the Antarctic Peninsula over the past 50 years, *The Cryosphere*, 4, 77–98, <https://doi.org/10.5194/tc-4-77-2010>, 2010.
- 615 Cook, A. J., Holland, P. R., Meredith, M. P., Murray, T., Luckman, A., and Vaughan, D. G.: Ocean forcing of glacier retreat in the western Antarctic Peninsula, *Science*, 353, 283–286, <https://doi.org/10.1126/science.aae0017>, 2016.
- 620 Cornford, S. L., Seroussi, H., Asay-Davis, X. S., Gudmundsson, G. H., Arthern, R., Borstad, C., Christmann, J., Dias dos Santos, T., Feldmann, J., Goldberg, D., Hoffman, M. J., Humbert, A., Kleiner, T., Leguy, G., Lipscomb, W. H., Merino, N., Durand, G., Morlighem, M., Pollard, D., Rückamp, M., Williams, C. R., and Yu, H.: Results of the third Marine Ice Sheet Model Intercomparison Project (MISMIP+), *The Cryosphere*, 14, 2283–2301, <https://doi.org/10.5194/tc-14-2283-2020>, 2020.
- Corr, H. F. J., Doake, C. S. M., Jenkins, A., and Vaughan, D. G.: Investigations of an “ice plain” in the mouth of Pine Island Glacier, Antarctica, *Journal of Glaciology*, 47, 51–57, <https://doi.org/10.3189/172756501781832395>, 2001.
- Das, A., Kumar, R., and Rosen, P.: Nisar Mission Overview and Updates on ISRO Science Plan, <https://doi.org/10.1109/InGARSS51564.2021.9791979>, 2022.
- 625 Davidson, M., Gebert, N., and Giulicchi, L.: ROSE-L – The L-band SAR Mission for Copernicus, in: EUSAR 2021; 13th European Conference on Synthetic Aperture Radar, EUSAR 2021; 13th European Conference on Synthetic Aperture Radar, 1–2, 2021.
- 630 Davison, B. J., Hogg, A. E., Rigby, R., Veldhuijsen, S., van Wessem, J. M., van den Broeke, M. R., Holland, P. R., Selley, H. L., and Dutrieux, P.: Sea level rise from West Antarctic mass loss significantly modified by large snowfall anomalies, *Nat Commun*, 14, 1479, <https://doi.org/10.1038/s41467-023-36990-3>, 2023.

- Dawson, G. J. and Bamber, J. L.: Antarctic Grounding Line Mapping From CryoSat-2 Radar Altimetry, *Geophysical Research Letters*, 44, 11,886–11,893, <https://doi.org/10.1002/2017GL075589>, 2017.
- Dawson, G. J. and Bamber, J. L.: Measuring the location and width of the Antarctic grounding zone using CryoSat-2, *The Cryosphere*, 14, 2071–2086, <https://doi.org/10.5194/tc-14-2071-2020>, 2020.
- 635 Edwards, T. L., Brandon, M. A., Durand, G., Edwards, N. R., Golledge, N. R., Holden, P. B., Nias, I. J., Payne, A. J., Ritz, C., and Wernecke, A.: Revisiting Antarctic ice loss due to marine ice-cliff instability, *Nature*, 566, 58–64, <https://doi.org/10.1038/s41586-019-0901-4>, 2019.
- Freer, B. I. D., Marsh, O. J., Hogg, A. E., Fricker, H. A., and Padman, L.: Modes of Antarctic tidal grounding line migration revealed by ICESat-2 laser altimetry, *Ice sheets/Antarctic*, <https://doi.org/10.5194/tc-2022-265>, 2023.
- 640 Fretwell, P., Pritchard, H. D., Vaughan, D. G., Bamber, J. L., Barrand, N. E., Bell, R., Bianchi, C., Bingham, R. G., Blankenship, D. D., Casassa, G., Catania, G., Callens, D., Conway, H., Cook, A. J., Corr, H. F. J., Damaske, D., Damm, V., Ferraccioli, F., Forsberg, R., Fujita, S., Gim, Y., Gogineni, P., Griggs, J. A., Hindmarsh, R. C. A., Holmlund, P., Holt, J. W., Jacobel, R. W., Jenkins, A., Jokat, W., Jordan, T., King, E. C., Kohler, J., Krabill, W., Riger-Kusk, M., Langley, K. A., Leitchenkov, G., Leuschen, C., Luyendyk, B. P., Matsuoka, K., Mouginot, J., Nitsche, F. O., Nogi, Y., Nost, O. A., Popov, S.
- 645 V., Rignot, E., Rippin, D. M., Rivera, A., Roberts, J., Ross, N., Siegert, M. J., Smith, A. M., Steinhage, D., Studinger, M., Sun, B., Tinto, B. K., Welch, B. C., Wilson, D., Young, D. A., Xiangbin, C., and Zirizzotti, A.: Bedmap2: improved ice bed, surface and thickness datasets for Antarctica, *The Cryosphere*, 7, 375–393, <https://doi.org/10.5194/tc-7-375-2013>, 2013.
- Fricker, H. A. and Padman, L.: Ice shelf grounding zone structure from ICESat laser altimetry, *Geophysical Research Letters*, 33, <https://doi.org/10.1029/2006GL026907>, 2006.
- 650 Fricker, H. A., Hyland, G., Coleman, R., and Young, N. W.: Digital elevation models for the Lambert Glacier–Amery Ice Shelf system, East Antarctica, from ERS-1 satellite radar altimetry, *Journal of Glaciology*, 46, 553–560, <https://doi.org/10.3189/172756500781832639>, 2000.
- Fricker, H. A., Coleman, R., Padman, L., Scambos, T. A., Bohlander, J., and Brunt, K. M.: Mapping the grounding zone of the Amery Ice Shelf, East Antarctica using InSAR, MODIS and ICESat, *Antarctic Science*, 21, 515–532, <https://doi.org/10.1017/S095410200999023X>, 2009.
- 655 Friedl, P., Seehaus, T. C., Wendt, A., Braun, M. H., and Höppner, K.: Recent dynamic changes on Fleming Glacier after the disintegration of Wordie Ice Shelf, Antarctic Peninsula, *The Cryosphere*, 12, 1347–1365, <https://doi.org/10.5194/tc-12-1347-2018>, 2018.
- Friedl, P., Weiser, F., Fluhrer, A., and Braun, M. H.: Remote sensing of glacier and ice sheet grounding lines: A review, *Earth-Science Reviews*, 201, 102948, <https://doi.org/10.1016/j.earscirev.2019.102948>, 2020.
- 660 Gardner, A. S., Moholdt, G., Scambos, T., Fahnestock, M., Ligtenberg, S., van den Broeke, M., and Nilsson, J.: Increased West Antarctic and unchanged East Antarctic ice discharge over the last 7 years, *The Cryosphere*, 12, 521–547, <https://doi.org/10.5194/tc-12-521-2018>, 2018.
- Gerrish, Laura: High resolution vector polygon seamask for areas south of 60S (7.2), <https://doi.org/10.5285/8295498A-0A14-4C62-AAFF-9D7C8648F9A5>, 2020.
- 665 Goldstein, R. M., Engelhardt, H., Kamb, B., and Frolich, R. M.: Satellite radar interferometry for monitoring ice sheet motion: Application to an Antarctic ice stream, *Science*, 262, 1525–1530, <https://doi.org/10.1126/science.262.5139.1525>, 1993.

- 670 Gourmelen, N., Goldberg, D. N., Snow, K., Henley, S. F., Bingham, R. G., Kimura, S., Hogg, A. E., Shepherd, A., Mouginot, J., Lenaerts, J. T. M., Ligtenberg, S. R. M., and van de Berg, W. J.: Channelized Melting Drives Thinning Under a Rapidly Melting Antarctic Ice Shelf, *Geophysical Research Letters*, 44, 9796–9804, <https://doi.org/10.1002/2017GL074929>, 2017.
- Gray, L., Short, N., Bindschadler, R., Joughin, I., Padman, L., Vornberger, P., and Khananian, A.: RADARSAT interferometry for Antarctic grounding-zone mapping, *Annals of Glaciology*, 34, 269–276, <https://doi.org/10.3189/172756402781817879>, 2002.
- 675 Greene, C. A., Gardner, A. S., Schlegel, N.-J., and Fraser, A. D.: Antarctic calving loss rivals ice-shelf thinning, *Nature*, 1–6, <https://doi.org/10.1038/s41586-022-05037-w>, 2022.
- 680 Hersbach, H., Bell, B., Berrisford, P., Hirahara, S., Horányi, A., Muñoz-Sabater, J., Nicolas, J., Peubey, C., Radu, R., Schepers, D., Simmons, A., Soci, C., Abdalla, S., Abellan, X., Balsamo, G., Bechtold, P., Biavati, G., Bidlot, J., Bonavita, M., Chiara, G., Dahlgren, P., Dee, D., Diamantakis, M., Dragani, R., Flemming, J., Forbes, R., Fuentes, M., Geer, A., Haimberger, L., Healy, S., Hogan, R. J., Hólm, E., Janisková, M., Keeley, S., Laloyaux, P., Lopez, P., Lupu, C., Radnoti, G., Rosnay, P., Rozum, I., Vamborg, F., Villaume, S., and Thépaut, J.: The ERA5 global reanalysis, *Q.J.R. Meteorol. Soc.*, 146, 1999–2049, <https://doi.org/10.1002/qj.3803>, 2020.
- Hersbach, H., Bell, B., Berrisford, P., Biavati, G., Horányi, A., Muñoz Sabater, J., Nicolas, J., Peubey, C., Radu, R., Rozum, I., Schepers, D., Simmons, A., Soci, C., Dee, D., and Thépaut, J.-N.: ERA5 hourly data on single levels from 1940 to present. Copernicus Climate Change Service (C3S) Climate Data Store (CDS), DOI: 10.24381/cds.adbb2d47, 2023.
- 685 Herzfeld, U. C., Lingle, C. S., and Lee, L.-H.: Recent advance of the grounding line of Lambert Glacier, Antarctica, deduced from satellite-radar altimetry, *Annals of Glaciology*, 20, 43–47, <https://doi.org/10.3189/1994AoG20-1-43-47>, 1994.
- Herzfeld, U. C., McBride, P. J., Zwally, H. J., and Dimarzio, J.: Elevation changes in Pine Island Glacier, Walgreen Coast, Antarctica, based on GLAS (2003) and ERS-1 (1995) altimeter data analyses and glaciological implications, *International Journal of Remote Sensing*, 29, 5533–5553, <https://doi.org/10.1080/01431160802020510>, 2008.
- 690 Hogg, A. E.: *Locating Ice Sheet Grounding Lines Using Satellite Radar Interferometry and Altimetry*, phd, University of Leeds, 152 pp., 2015.
- Hogg, A. E., Shepherd, A., Gilbert, L., Muir, A., and Drinkwater, M. R.: Mapping ice sheet grounding lines with CryoSat-2, *Advances in Space Research*, 62, 1191–1202, <https://doi.org/10.1016/j.asr.2017.03.008>, 2018.
- 695 Howat, I., Porter, C., Noh, M.-J., Husby, E., Khuvis, S., Danish, E., Tomko, K., Gardiner, J., Negrete, A., Yadav, B., Klassen, J., Kelleher, C., Cloutier, M., Bakker, J., Enos, J., Arnold, G., Bauer, G., and Morin, P.: The Reference Elevation Model of Antarctica - Mosaics, Version 2, <https://doi.org/10.7910/DVN/EBW8UC>, 2022.
- Howat, I. M., Porter, C., Smith, B. E., Noh, M.-J., and Morin, P.: The Reference Elevation Model of Antarctica, *The Cryosphere*, 13, 665–674, <https://doi.org/10.5194/tc-13-665-2019>, 2019.
- 700 Howard, S. L., Erofeeva, S., & Padman, L. (2019) "CATS2008: Circum-Antarctic Tidal Simulation version 2008" U.S. Antarctic Program (USAP) Data Center. <https://doi.org/10.15784/601235>
- Huss, M. and Farinotti, D.: A high-resolution bedrock map for the Antarctic Peninsula, *The Cryosphere*, 8, 1261–1273, <https://doi.org/10.5194/tc-8-1261-2014>, 2014.
- 705 Jonathan, B. and R, B. C.: A comparison of satellite-altimetry and ice-thickness measurements of the Ross Ice Shelf, Antarctica, *Annals of Glaciology*, 20, 357–364, <https://doi.org/10.3189/1994AoG20-1-357-364>, 1994.

- Joughin, I., Smith, B. E., and Abdalati, W.: Glaciological advances made with interferometric synthetic aperture radar, *Journal of Glaciology*, 56, 1026–1042, <https://doi.org/10.3189/002214311796406158>, 2010a.
- Joughin, I., Smith, B. E., and Holland, D. M.: Sensitivity of 21st century sea level to ocean-induced thinning of Pine Island Glacier, Antarctica, *Geophysical Research Letters*, 37, <https://doi.org/10.1029/2010GL044819>, 2010b.
- 710 Joughin, I., Alley, R. B., and Holland, D. M.: Ice-Sheet Response to Oceanic Forcing, *Science*, 338, 1172–1176, <https://doi.org/10.1126/science.1226481>, 2012.
- Joughin, I., Shean, D. E., Smith, B. E., and Dutrioux, P.: Grounding line variability and subglacial lake drainage on Pine Island Glacier, Antarctica, *Geophysical Research Letters*, 43, 9093–9102, <https://doi.org/10.1002/2016GL070259>, 2016.
- 715 King, M. A., Padman, L., Nicholls, K., Clarke, P. J., Gudmundsson, G. H., Kulesa, B., and Shepherd, A.: Ocean tides in the Weddell Sea: New observations on the Filchner-Ronne and Larsen C ice shelves and model validation, *Journal of Geophysical Research: Oceans*, 116, <https://doi.org/10.1029/2011JC006949>, 2011.
- Li, T., Dawson, G. J., Chuter, S. J., and Bamber, J. L.: Mapping the grounding zone of Larsen C Ice Shelf, Antarctica, from ICESat-2 laser altimetry, *The Cryosphere*, 14, 3629–3643, <https://doi.org/10.5194/tc-14-3629-2020>, 2020.
- 720 Li, T., Dawson, G. J., Chuter, S. J., and Bamber, J. L.: A high-resolution Antarctic grounding zone product from ICESat-2 laser altimetry, *Earth System Science Data*, 14, 535–557, <https://doi.org/10.5194/essd-14-535-2022>, 2022.
- Marsh, O. J., Rack, W., Floricioiu, D., Golledge, N. R., and Lawson, W.: Tidally induced velocity variations of the Beardmore Glacier, Antarctica, and their representation in satellite measurements of ice velocity, *The Cryosphere*, 7, 1375–1384, <https://doi.org/10.5194/tc-7-1375-2013>, 2013.
- 725 Miles, B. W. J. and Bingham, R. G.: Progressive unanchoring of Antarctic ice shelves since 1973, *Nature*, 626, 785–791, <https://doi.org/10.1038/s41586-024-07049-0>, 2024.
- Milillo, P., Rignot, E., Rizzoli, P., Scheuchl, B., Mougintot, J., Bueso-Bello, J. L., Prats-Iraola, P., and Dini, L.: Rapid glacier retreat rates observed in West Antarctica, *Nat. Geosci.*, 15, 48–53, <https://doi.org/10.1038/s41561-021-00877-z>, 2022.
- 730 Mohajerani, Y., Jeong, S., Scheuchl, B., Velicogna, I., Rignot, E., and Milillo, P.: Automatic delineation of glacier grounding lines in differential interferometric synthetic-aperture radar data using deep learning, *Sci Rep*, 11, <https://doi.org/10.1038/s41598-021-84309-3>, 2021.
- Mougintot, J., Rignot, E., and Scheuchl, B.: Sustained increase in ice discharge from the Amundsen Sea Embayment, West Antarctica, from 1973 to 2013, *Geophysical Research Letters*, 41, 1576–1584, <https://doi.org/10.1002/2013GL059069>, 2014.
- MEaSURES Antarctic Boundaries for IPY 2007-2009 from Satellite Radar, Version 2 [Data Set. Boulder, Colorado USA. NASA National Snow and Ice Data Center Distributed Active Archive Center.: <https://doi.org/10.5067/IKBWW4RYHF1Q>.
- 735 Needell, C. and Holschuh, N.: Evaluating the Retreat, Arrest, and Regrowth of Crane Glacier Against Marine Ice Cliff Process Models, *Geophysical Research Letters*, 50, e2022GL102400, <https://doi.org/10.1029/2022GL102400>, 2023.
- Ochwat, N. E., Scambos, T. A., Banwell, A. F., Anderson, R. S., Maclennan, M. L., Picard, G., Shates, J. A., Marinsek, S., Margonari, L., Truffer, M., and Pettit, E. C.: Triggers of the 2022 Larsen B multi-year landfast sea ice break-out and initial glacier response, *The Cryosphere Discussions*, 1–34, <https://doi.org/10.5194/tc-2023-88>, 2023.

- 740 Ootosaka, I. N., Shepherd, A., Ivins, E. R., Schlegel, N.-J., Amory, C., van den Broeke, M. R., Horwath, M., Joughin, I., King, M. D., Krinner, G., Nowicki, S., Payne, A. J., Rignot, E., Scambos, T., Simon, K. M., Smith, B. E., Sørensen, L. S., Velicogna, I., Whitehouse, P. L., A. G., Agosta, C., Ahlstrøm, A. P., Blazquez, A., Colgan, W., Engdahl, M. E., Fettweis, X., Forsberg, R., Gallée, H., Gardner, A., Gilbert, L., Gourmelen, N., Groh, A., Gunter, B. C., Harig, C., Helm, V., Khan, S. A., Kittel, C., Konrad, H., Langen, P. L., Lecavalier, B. S., Liang, C.-C., Loomis, B. D., McMillan, M., Melini, D., Mernild, S. H., Mottram, R., Mouginot, J., Nilsson, J., Noël, B., Pattle, M. E., Peltier, W. R., Pie, N., Roca, M., Sasgen, I., Save, H. V., Seo, K.-W., Scheuchl, B., Schrama, E. J. O., Schröder, L., Simonsen, S. B., Slater, T., Spada, G., Sutterley, T. C., Vishwakarma, B. D., van Wessem, J. M., Wiese, D., van der Wal, W., and Wouters, B.: Mass balance of the Greenland and Antarctic ice sheets from 1992 to 2020, *Earth System Science Data*, 15, 1597–1616, <https://doi.org/10.5194/essd-15-1597-2023>, 2023.
- 745 Padman, L., Fricker, H. A., Coleman, R., Howard, S., and Erofeeva, L.: A new tide model for the Antarctic ice shelves and seas, *Annals of Glaciology*, 34, 247–254, <https://doi.org/10.3189/172756402781817752>, 2002.
- Padman, L., King, M., Goring, D., Corr, H., and Coleman, R.: Ice-shelf elevation changes due to atmospheric pressure variations, *Journal of Glaciology*, 49, 521–526, <https://doi.org/10.3189/172756503781830386>, 2003.
- Padman, L., Siegfried, M. R., and Fricker, H. A.: Ocean Tide Influences on the Antarctic and Greenland Ice Sheets, *Reviews of Geophysics*, 56, 142–184, <https://doi.org/10.1002/2016RG000546>, 2018.
- 755 Paolo, F. S., Fricker, H. A., and Padman, L.: Volume loss from Antarctic ice shelves is accelerating, *Science*, 348, 327–331, <https://doi.org/10.1126/science.aaa0940>, 2015.
- Partington, K. C., Cudlip, W., McIntyre, N. F., and King-Hele, S.: Mapping of Amery Ice Shelf, Antarctica, Surface Features by Satellite Altimetry, *Annals of Glaciology*, 9, 183–188, <https://doi.org/10.3189/S0260305500000586>, 1987.
- 760 Pattyn, F.: The paradigm shift in Antarctic ice sheet modelling, *Nat Commun*, 9, 2728, <https://doi.org/10.1038/s41467-018-05003-z>, 2018.
- Pattyn, F., Huyghe, A., De Brabander, S., and De Smedt, B.: Role of transition zones in marine ice sheet dynamics, *Journal of Geophysical Research: Earth Surface*, 111, <https://doi.org/10.1029/2005JF000394>, 2006.
- Rack, W. and Rott, H.: Pattern of retreat and disintegration of the Larsen B ice shelf, Antarctic Peninsula, *Annals of Glaciology*, 39, 505–510, <https://doi.org/10.3189/172756404781814005>, 2004.
- 765 Rebesco, M., Domack, E., Zgur, F., Lavoie, C., Leventer, A., Brachfeld, S., Willmott, V., Halverson, G., Truffer, M., Scambos, T., Smith, J., and Pettit, E.: Boundary condition of grounding lines prior to collapse, Larsen-B Ice Shelf, Antarctica, *Science*, 345, 1354–1358, <https://doi.org/10.1126/science.1256697>, 2014.
- Rignot, E.: Tidal motion, ice velocity and melt rate of Petermann Gletscher, Greenland, measured from radar interferometry, *Journal of Glaciology*, 42, 476–485, <https://doi.org/10.3189/S0022143000003464>, 1996.
- 770 Rignot, E., Casassa, G., Gogineni, P., Krabill, W., Rivera, A., and Thomas, R.: Accelerated ice discharge from the Antarctic Peninsula following the collapse of Larsen B ice shelf, *Geophysical Research Letters*, 31, L18401 1-4, <https://doi.org/10.1029/2004GL020697>, 2004.
- Rignot, E., Mouginot, J., and Scheuchl, B.: Antarctic grounding line mapping from differential satellite radar interferometry, *Geophysical Research Letters*, 38, <https://doi.org/10.1029/2011GL047109>, 2011.
- 775 Rignot, E., Jacobs, S., Mouginot, J., and Scheuchl, B.: Ice-Shelf Melting Around Antarctica, *Science*, 341, 266–270, <https://doi.org/10.1126/science.1235798>, 2013.

- Rignot, E., Mouginot, J., Morlighem, M., Seroussi, H., and Scheuchl, B.: Widespread, rapid grounding line retreat of Pine Island, Thwaites, Smith, and Kohler glaciers, West Antarctica, from 1992 to 2011, *Geophys. Res. Lett.*, 41, 3502–3509, <https://doi.org/10.1002/2014GL060140>, 2014.
- 780 Rignot, E., J. Mouginot, and B. Scheuchl: MEaSUREs Antarctic Grounding Line from Differential Satellite Radar Interferometry, Version 2, <https://doi.org/10.5067/IKBWW4RYHF1Q>, 2016.
- Rignot, E., Mouginot, J., and Scheuchl, B.: MEaSUREs InSAR-Based Antarctica Ice Velocity Map, Version 2, <https://doi.org/10.5067/D7GK8F5J8M8R>, 2017.
- 785 Rignot, E., Mouginot, J., Scheuchl, B., Broeke, M. van den, Wessem, M. J. van, and Morlighem, M.: Four decades of Antarctic Ice Sheet mass balance from 1979–2017, *PNAS*, 116, 1095–1103, <https://doi.org/10.1073/pnas.1812883116>, 2019.
- Rignot, E. J.: Fast Recession of a West Antarctic Glacier, *Science*, 281, 549–551, <https://doi.org/10.1126/science.281.5376.549>, 1998.
- 790 Rosen, P., Hensley, S., Shaffer, S., Edelstein, W., Kim, Y., Kumar, R., Misra, T., Bhan, R., and Sagi, R.: The NASA-ISRO SAR (NISAR) mission dual-band radar instrument preliminary design, in: 2017 IEEE International Geoscience and Remote Sensing Symposium (IGARSS), 2017 IEEE International Geoscience and Remote Sensing Symposium (IGARSS), 3832–3835, <https://doi.org/10.1109/IGARSS.2017.8127836>, 2017.
- Rott, H., Skvarca, P., and Nagler, T.: Rapid Collapse of Northern Larsen Ice Shelf, *Antarctica*, *Science*, 271, 788–792, <https://doi.org/10.1126/science.271.5250.788>, 1996.
- 795 Rott, H., Müller, F., Nagler, T., and Floricioiu, D.: The imbalance of glaciers after disintegration of Larsen-B ice shelf, *Antarctic Peninsula*, *The Cryosphere*, 5, 125–134, <https://doi.org/10.5194/tc-5-125-2011>, 2011.
- Rott, H., Abdel Jaber, W., Wuite, J., Scheiblauer, S., Floricioiu, D., van Wessem, J. M., Nagler, T., Miranda, N., and van den Broeke, M. R.: Changing pattern of ice flow and mass balance for glaciers discharging into the Larsen A and B embayments, *Antarctic Peninsula*, 2011 to 2016, *The Cryosphere*, 12, 1273–1291, <https://doi.org/10.5194/tc-12-1273-2018>, 2018.
- 800 Rott, H., Wuite, J., De Rydt, J., Gudmundsson, G. H., Floricioiu, D., and Rack, W.: Impact of marine processes on flow dynamics of northern Antarctic Peninsula outlet glaciers, *Nature Communications*, 11, 2969, <https://doi.org/10.1038/s41467-020-16658-y>, 2020.
- Scambos, T. A., Bohlander, J. A., Shuman, C. A., and Skvarca, P.: Glacier acceleration and thinning after ice shelf collapse in the Larsen B embayment, *Antarctica*, *Geophysical Research Letters*, 31, <https://doi.org/10.1029/2004GL020670>, 2004.
- 805 Scambos, T. A., Haran, T. M., Fahnestock, M. A., Painter, T. H., and Bohlander, J.: MODIS-based Mosaic of Antarctica (MOA) data sets: Continent-wide surface morphology and snow grain size, *Remote Sensing of Environment*, 111, 242–257, <https://doi.org/10.1016/j.rse.2006.12.020>, 2007.
- Schoof, C.: Ice sheet grounding line dynamics: Steady states, stability, and hysteresis, *Journal of Geophysical Research: Earth Surface*, 112, <https://doi.org/10.1029/2006JF000664>, 2007.
- 810 Seehaus, T. C., Marinsek, S., Skvarca, P., van Wessem, J. M., Reijmer, C. H., Seco, J. L., and Braun, M. H.: Dynamic Response of Sjøgren Inlet Glaciers, *Antarctic Peninsula*, to Ice Shelf Breakup Derived from Multi-Mission Remote Sensing Time Series, *Front. Earth Sci.*, 4, <https://doi.org/10.3389/feart.2016.00066>, 2016.

- Shepherd, A., Wingham, D., Payne, T., and Skvarca, P.: Larsen Ice Shelf Has Progressively Thinned, *Science*, 302, 856–859, <https://doi.org/10.1126/science.1089768>, 2003.
- 815 Shepherd, A., Ivins, E., Rignot, E., Smith, B., van den Broeke, M., Velicogna, I., Whitehouse, P., Briggs, K., Joughin, I., Krinner, G., Nowicki, S., Payne, T., Scambos, T., Schlegel, N., A, G., Agosta, C., Ahlstrøm, A., Babonis, G., Barletta, V., Blazquez, A., Bonin, J., Csatho, B., Cullather, R., Felikson, D., Fettweis, X., Forsberg, R., Gallee, H., Gardner, A., Gilbert, L., Groh, A., Gunter, B., Hanna, E., Harig, C., Helm, V., Horvath, A., Horwath, M., Khan, S., Kjeldsen, K. K., Konrad, H., Langen, P., Lecavalier, B., Loomis, B., Luthcke, S., McMillan, M., Melini, D., Mernild, S., Mohajerani, Y., Moore, P., Mougino, J., Moyano, G., Muir, A., Nagler, T., Niell, G., Nilsson, J., Noel, B., Otosaka, I., Pattle, M. E., Peltier, W. R., Pie, 820 N., Rietbroek, R., Rott, H., Sandberg-Sørensen, L., Sasgen, I., Save, H., Scheuchl, B., Schrama, E., Schröder, L., Seo, K.-W., Simonsen, S., Slater, T., Spada, G., Sutterley, T., Talpe, M., Tarasov, L., van de Berg, W. J., van der Wal, W., van Wessem, M., Vishwakarma, B. D., Wiese, D., Wouters, B., and The IMBIE team: Mass balance of the Antarctic Ice Sheet from 1992 to 2017, *Nature*, 558, 219–222, <https://doi.org/10.1038/s41586-018-0179-y>, 2018.
- Smith, A. M.: The use of tiltmeters to study the dynamics of Antarctic ice-shelf grounding lines, *Journal of Glaciology*, 37, 825 51–58, <https://doi.org/10.3189/S0022143000042799>, 1991.
- Stearns, L. A.: Dynamics and mass balance of four large East Antarctic outlet glaciers, *Annals of Glaciology*, 52, 116–126, <https://doi.org/10.3189/172756411799096187>, 2011.
- Strozzi, T., Luckman, A., Murray, T., and Wegmuller, U.: Glacier Motion Estimation Using SAR Offset-Tracking Procedures, *Geoscience and Remote Sensing, IEEE Transactions on*, 40, 2384–2391, <https://doi.org/10.1109/TGRS.2002.805079>, 2002.
- 830 Surawy-Stepney, T., Hogg, A. E., Cornford, S. L., Wallis, B. J., Davison, B. J., Selley, H. L., Slater, R. A. W., Lie, E. K., Jakob, L., Ridout, A. L., Gourmelen, N., Freer, B. I. D., Wilson, S. F., and Shepherd, A.: The impact of landfast sea ice buttressing on ice dynamic speedup in the Larsen-B Embayment, Antarctica, *The Cryosphere Discussions*, 1–24, <https://doi.org/10.5194/tc-2023-128>, 2023.
- Vaughan, D. G.: Investigating tidal flexure on an ice shelf using kinematic GPS, *Annals of Glaciology*, 20, 372–376, 835 <https://doi.org/10.3189/1994AoG20-1-372-376>, 1994.
- Vieli, A. and Payne, A. J.: Assessing the ability of numerical ice sheet models to simulate grounding line migration, *Journal of Geophysical Research: Earth Surface*, 110, <https://doi.org/10.1029/2004JF000202>, 2005.
- Wallis, B. J., Hogg, A. E., van Wessem, J. M., Davison, B. J., and van den Broeke, M. R.: Widespread seasonal speed-up of west Antarctic Peninsula glaciers from 2014 to 2021, *Nat. Geosci.*, 1–7, <https://doi.org/10.1038/s41561-023-01131-4>, 2023.
- 840 Xie, H., Chen, L., Liu, S., Jin, Y., Liu, J., Liu, S., and Tong, X.: A Least-Squares Adjusted Grounding Line for the Amery Ice Shelf Using ICESat and Landsat 8 OLI Data, *IEEE Journal of Selected Topics in Applied Earth Observations and Remote Sensing*, 9, 5113–5122, <https://doi.org/10.1109/JSTARS.2016.2614758>, 2016.
- Zhong, M., Simons, M., Minchew, B., and Zhu, L.: Inferring Tide-Induced Ephemeral Grounding in an Ice-Shelf-Stream System: Rutford Ice Stream, West Antarctica, *Journal of Geophysical Research: Earth Surface*, 128, e2022JF006789, 845 <https://doi.org/10.1029/2022JF006789>, 2023.

## **Appendix A: Additional detail of Antarctic Peninsula grounding line product**

850 To accompany this paper, we provide a new grounding line dataset for the Antarctic Peninsula produced from our TMOC data  
valid for the period 2019 to 2020. This data covers the mainland Peninsula and islands in contact with ice shelves. We use the  
TMOC algorithm as described using Sentinel-1 SAR data for the period 2019 to 2020. Where the TMOC method does not  
detect floating ice, for example at rocky coastline or on glaciers with no ice tongue, we use the British Antarctic Survey  
coastline data for 2020 (Gerrish, 2020) so that we may provide continuous coverage of the coastline. One exception is Cadman  
855 Glacier which accelerated dramatically in 2019, here we use a grounding line derived from the REMA DEM to provide the  
grounding line (Wallis et al. 2023b). Our grounding line data is provided as a continuous closed grounding line for analysis  
purposes and as a collection of the individual line segments with their sources included.



Ammended figures and captions:

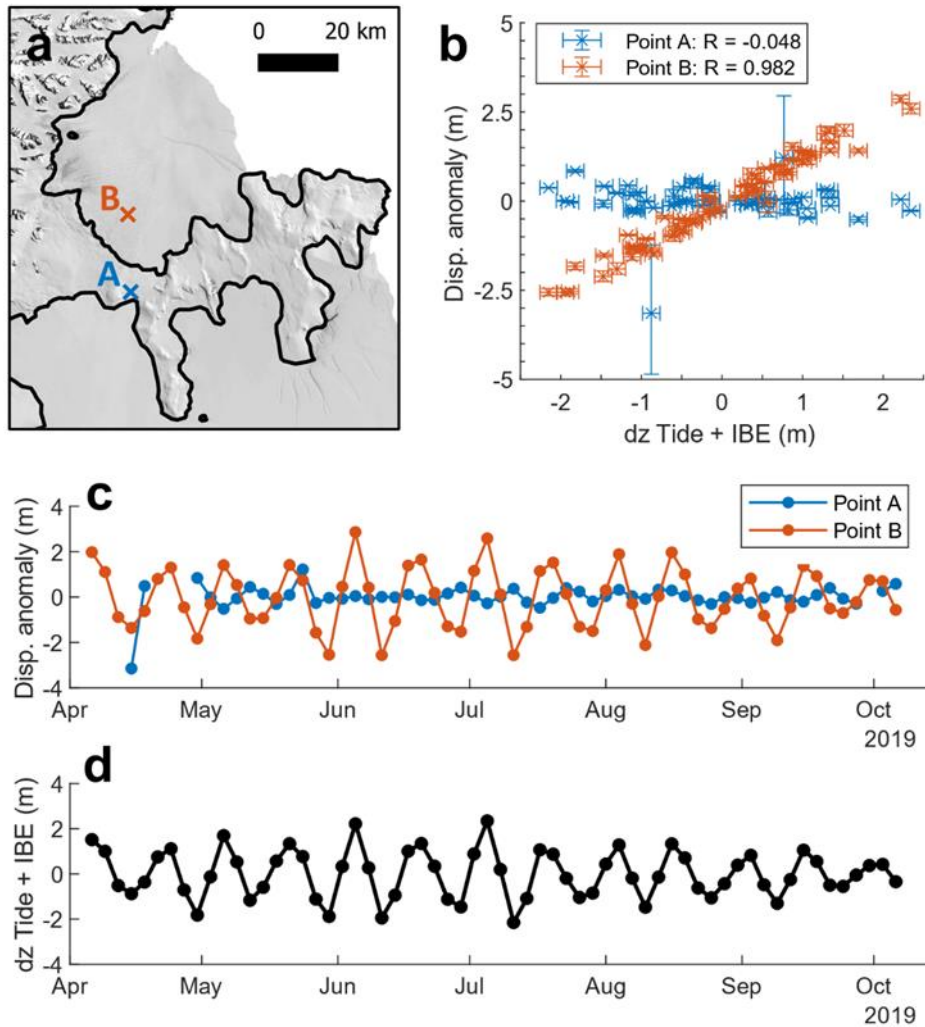

**Figure 1:** Measurement principle of the tidal motion offset correlation (TMOC) method. (a) Location of points A and B on the Jason Peninsula and the Larsen-B remnant respectively. The base-map is the LIMA Landsat mosaic (Bindschadler et al., 2008), with the MEaSUREs Antarctic boundaries v2 grounding line (black line) (Rignot et al., 2016) and sea-mask (Gerrish, 2020). (b) Differential tide plus inverse barometer effect plotted against the range direction anomaly for points A and B using ice velocity measurements from April 2019 to October 2019. (c) Time-series of range direction displacement anomaly for points A and B for April 2019 to October 2019. (d) Time-series of differential tide plus inverse barometer effect for April 2019 to October 2019 for point A.

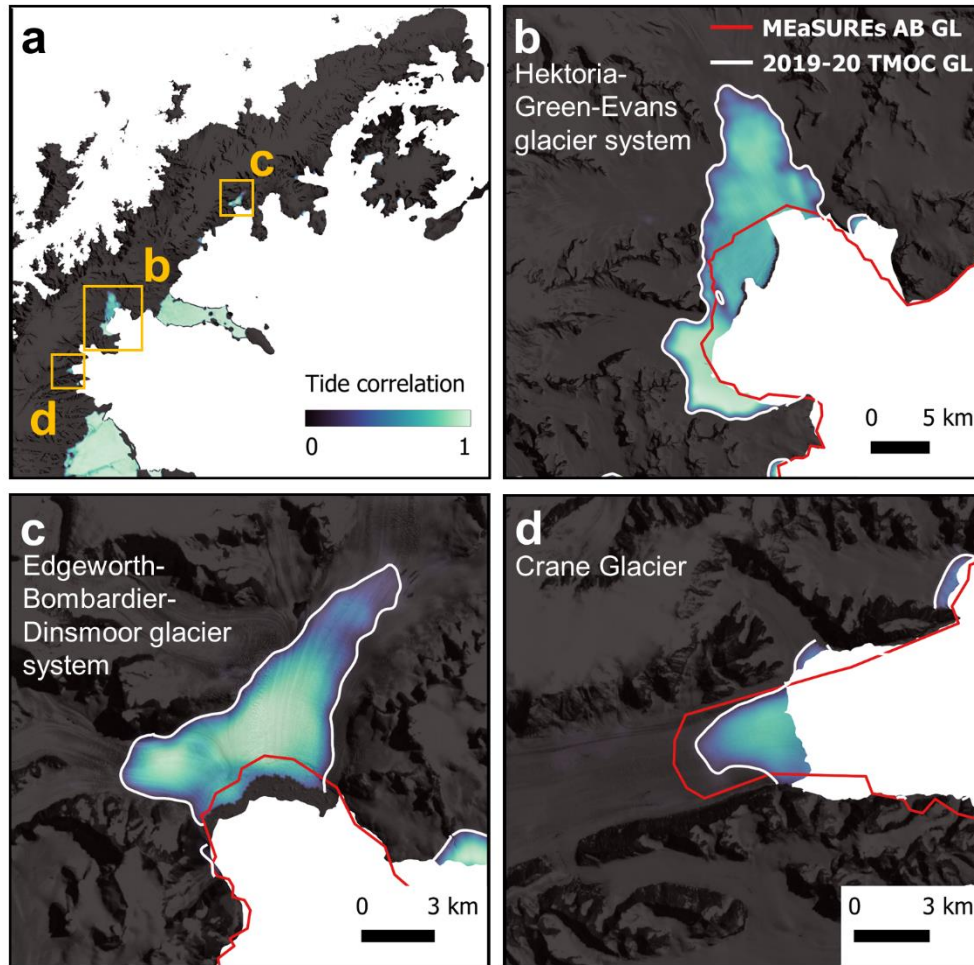

**Figure 5: Examples of grounding line change on the north-eastern coast of the Antarctic Peninsula.** (a) Summary map of the northern Antarctic Peninsula where the map shows the TMOC significance adjusted tide correlation ( $R'$ ). (b-d) Zoomed in map of Hektoria-Green-Evans Glacier system (b), Edgeworth-Bombardier-Dinsmoor Glacier system (c), and Crane Glacier (d). In all maps the LIMA Landsat mosaic (Bindschadler et al., 2008) is used as a background image, with the BAS 2020 coastline (Gerrish, 2020), MEaSUREs Antarctic Boundaries v2 GL (Mouginot et al., 2017) (red line) and TMOC 2019-20 grounding line (white line) also annotated.

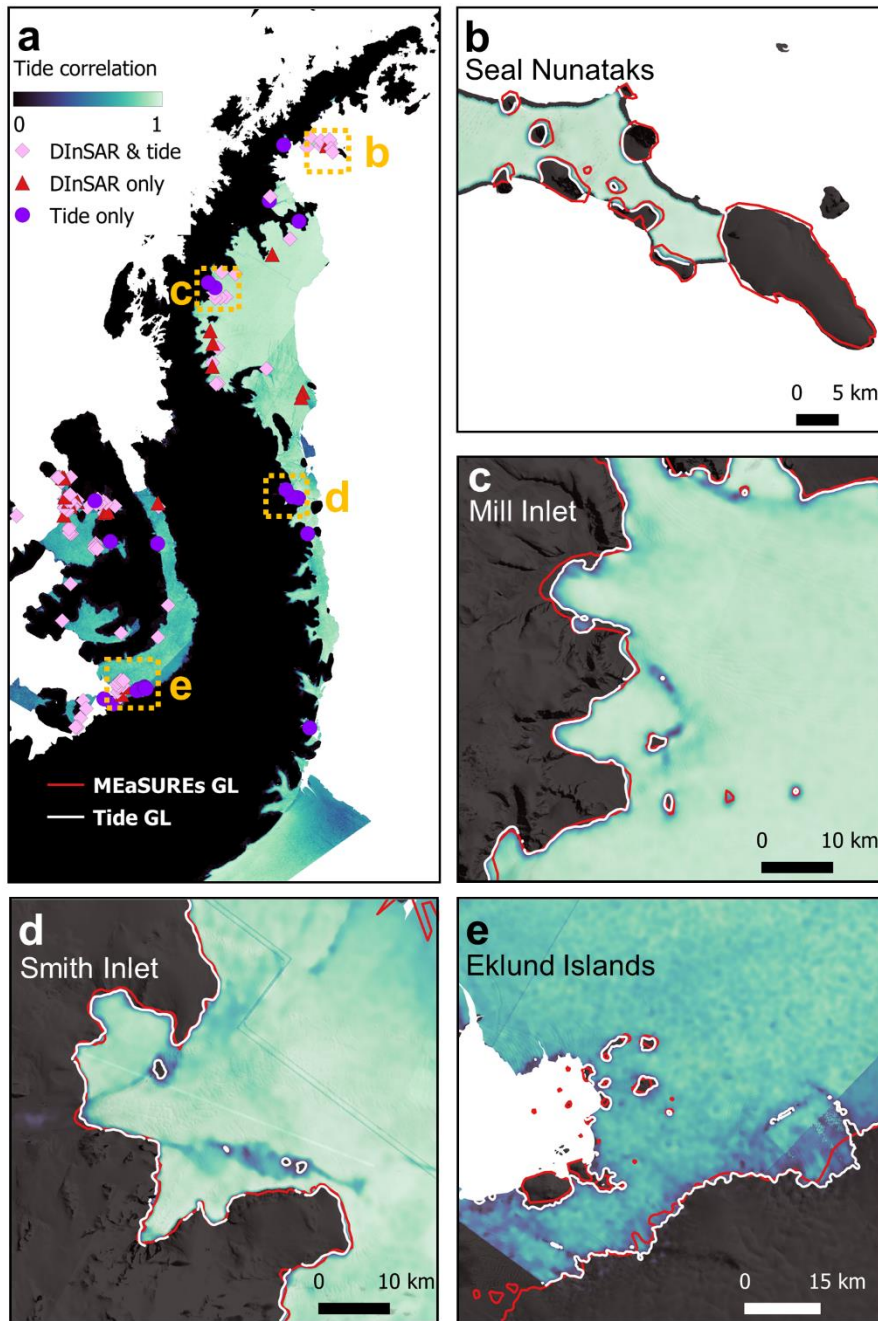

**Figure 6: Pinning points measured using TMOc and MEaSURES Antarctic Boundaries v2 (MABv2) data.** (a) Map of TMOc significance adjusted tide correlation ( $R'$ ) and pinning points across the Antarctic Peninsula. Pinning points are classified according to whether they appear in: both MABv2 DInSAR (Mouginot et al., 2017) and TMOc data (pink diamond), MABv2 DInSAR only (red triangle) and TMOc only (purple circle). (b-e) Maps of TMOc significance adjusted tide correlation ( $R'$ ), TMOc 2019-20 grounding line (white line), MABv2 grounding line (red line), with a LIMA Landsat mosaic base-map (Bindschadler et al., 2008) and BAS 2020 coastline and sea-mask (Gerrish, 2020). Zoomed in locations featured: (b) Seal Nunataks, (c) Mill Inlet, Larsen-C Ice Shelf, (d) Smith Inlet, Larsen-D Ice Shelf, (e) Eklund Islands, George VI Ice Shelf.

Amended supplementary material:

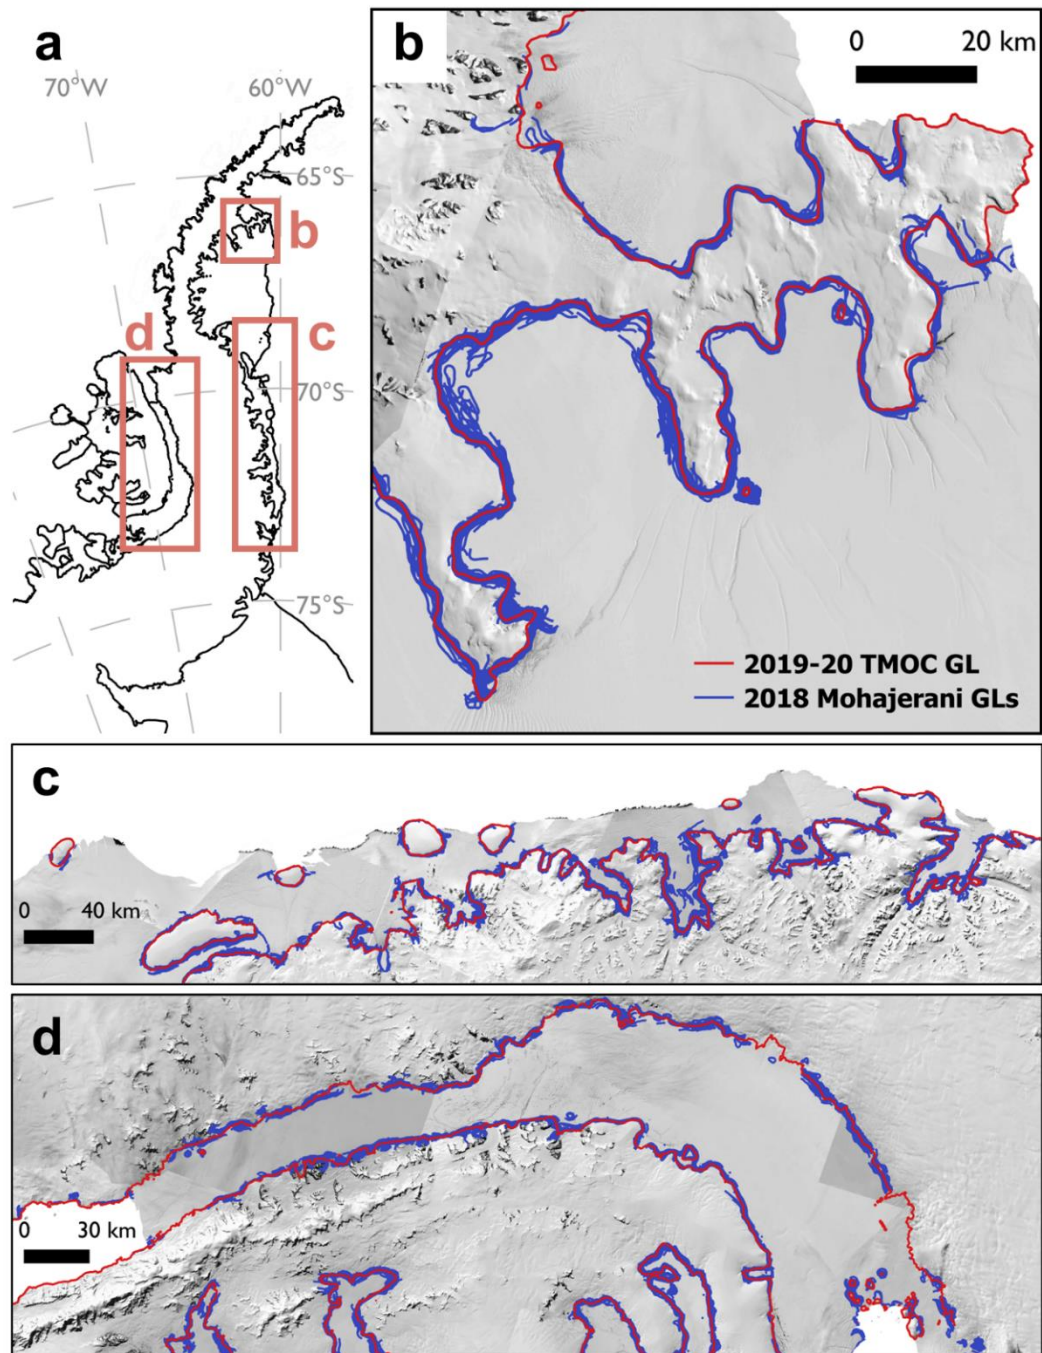

**Figure S1.** Comparison between 2019-2020 TMOc grounding line (GL) and the set of grounding lines from Mohajerani et al. 2021. (a) Overview map of the Antarctic Peninsula. Coastline and grounding line from MEaSUREs Antarctic Boundaries v2 (Mouginot et al., 2017). (b) Insert of the Jason Peninsula, (c) Larsen-D Ice Shelf, (d) George VI Ice Shelf all showing the 2019-2020 TMOc GL (red) and the set of GLs from Mohajerani et al. 2021 (blue). Background image is LIMA Landsat mosaic (Bindschadler et al. 2008).
